## A comprehensive study of Phospholipid fatty acid rearrangements in the early onset of the metabolic syndrome: correlations to organ dysfunction.

Amélie Bacle\*<sup>1</sup>, Linette Kadri\*<sup>1</sup>, Spiro Khoury<sup>1</sup>, Romain Ferru-Clément<sup>1</sup>, Jean-François Faivre<sup>1,2</sup>, Christian Cognard<sup>2</sup>, Jocelyn Bescond<sup>2</sup>, Amandine Krzesiak<sup>2</sup>, Hugo Contzler<sup>2</sup>, Nathalie Delpech<sup>3</sup>, Jenny Colas<sup>1,2</sup>, Clarisse Vandebrouck<sup>1,2</sup>, Stéphane Sébille<sup>1,2</sup> and Thierry Ferreira<sup>1,4</sup>

\* These authors contributed equally to this work

<sup>1</sup> Laboratoire “Lipotoxicity and Channelopathies (LiTch) - ConicMeds”, Université de Poitiers, 1, rue Georges Bonnet, Poitiers, France.

<sup>2</sup> Laboratoire “Signalisation et Transports Ioniques Membranaires (STIM; EA 7349)”, Université de Poitiers, 1, rue Georges Bonnet, Poitiers, France.

<sup>3</sup> Laboratoire “Mobilité Vieillesse et Exercice (MOVE; EA 6314)”, Université de Poitiers, 8, Allée Jean Monnet, Poitiers, France.

<sup>4</sup> Corresponding author :

Thierry Ferreira

Laboratoire “Lipotoxicity and Channelopathies (LiTch)”, Université de Poitiers, 1, rue Georges Bonnet, Poitiers, France.

e. mail: [thierry.ferreira@univ-poitiers.fr](mailto:thierry.ferreira@univ-poitiers.fr)

Phone: (33) 5 49 45 40 04

This work was supported by the Ministère de l’Education Nationale, de l’Enseignement Supérieur et de la Recherche (French MENRT) and the FEDER (Fonds Européen de Développement Régional), with grants to L. K. and A. B.

The authors declare no competing or financial interests.

For information, Thierry Ferreira is an associate professor at the University of Poitiers, but is also the President of a Biotechnology company, ConicMeds Development, which aims at developing new candidate drugs in the field of lipointoxication-related diseases. However, no reference to these molecules is made in the present manuscript and the company did not participate in the financing of this work, which corresponds to purely fundamental research.

Running title: Diet-induced rearrangements of phospholipids

Data described in the manuscript will be made available from the corresponding author upon request

## 1      Abstract

2      The balance within phospholipids (PL) between Saturated Fatty Acids (SFA) and mono- or poly-  
3      Unsaturated Fatty Acids (UFA), is known to regulate the biophysical properties of cellular membranes.  
4      As a consequence, perturbing this balance alters crucial cellular processes in many cell types, such  
5      as vesicular budding and the trafficking/function of membrane-anchored proteins. The worldwide  
6      spreading of the Western-diet, which is specifically enriched in saturated fats, has been clearly  
7      correlated with the emergence of a complex syndrome, known as the Metabolic Syndrome (MetS),  
8      which is defined as a cluster of risk factors for cardiovascular diseases, type 2 diabetes and hepatic  
9      steatosis. However, no clear correlations between diet-induced fatty acid redistribution within cellular  
10     PL, the severity/chronology of the symptoms associated to MetS and the function of the targeted  
11     organs, particularly in the early onset of the disease, have been established. In an attempt to fill this  
12     gap, we analyzed in the present study PL remodeling in rats exposed during 15 weeks to a High Fat/High  
13     Fructose diet (HFHF) in several organs, including known MetS targets. We show that fatty acids from  
14     the diet can distribute within PL in a very selective way, with PhosphatidylCholine being the preferred  
15     sink for this distribution. Moreover, in the HFHF rat model, most organs are protected from this  
16     redistribution, at least during the early onset of MetS, at the exception of the liver and skeletal muscles.  
17     Interestingly, such a redistribution correlates with clear-cut alterations in the function of these organs.

18

19     *Keywords:* Saturated fat; Phospholipids; Type 2 Diabetes; Cardiovascular diseases; Hepatic Steatosis;  
20     polyunsaturated fatty acids

## 21 1. Introduction

22 The first observations concerning the involvement of obesity and dyslipidemia in the occurrence of  
23 metabolic disorders, including type 2 diabetes, fatty liver and cardiovascular diseases, go back to the  
24 late 1960's. Since then, the prevalence of this metabolic syndrome has been clearly correlated to the  
25 worldwide spreading of the Western-diet which is excessively rich in sugar and saturated fat. In obese  
26 individuals, the incidence of the metabolic syndrome is associated with high plasma levels of Non  
27 Esterified Fatty Acids (NEFA) and more specifically of long-chain saturated fatty acids (SFA) (1). A prime  
28 example of long chain SFA is Palmitate (bearing 16 carbons and no double-bond in the acyl chain: 16:0),  
29 the main component of Palm oil. When the storage capacity of the adipose tissue is exceeded, NEFA  
30 tend to accumulate into cells not suited for lipid storage, among which muscle cells, hepatocytes and  
31 pancreatic  $\beta$ -cells are prime examples (1). As a corollary, it is now widely accepted that fatty acid  
32 imbalances are directly involved in the promotion of insulin resistance, non-alcoholic steatohepatitis  
33 (NASH), impaired glucose tolerance and systemic inflammation (2).

34 Phospholipids (PL), which bear two fatty acid chains, are the main components of cellular membranes.  
35 In mammalian cells, PhosphatidylCholine (PC) is the most abundant PL (3). Ethanolamine (Etn)-  
36 containing PL species are the second most abundant phospholipids, in which  
37 PhosphatidylEthanolamine (PE), a diacyl glycerophospholipid, and ethanolamine plasmalogen (PE(P)),  
38 an alkenylacylglycerophospholipid, are the main constituents (4, 5). These species, and to a lesser  
39 extent, Phosphatidylinositol (PI) and PhosphatidylSerine (PS), are the most abundant lipid classes  
40 whatever the organ considered, constituting 75 % of all lipid species in the heart of rats, and 79 % in  
41 the liver, as examples (3). Maintaining the equilibrium between SFA, Mono- and Poly- Unsaturated  
42 Fatty Acids (UFA) within membrane PL is crucial to sustain the optimal membrane biophysical  
43 properties, compatible with selective organelle based processes, including vesicular budding or  
44 membrane-protein trafficking and function (6). As a corollary, impaired balances within SFA and UFA  
45 have been demonstrated to result in dramatic cellular dysfunctions in cells relevant of the metabolic

46 syndrome (for review, see (7)). As examples, altered insulin secretion in pancreatic  $\beta$ -cells or  
47 impairment in Glucose disposal in muscle and liver cells have been reported in response to SFA  
48 overload (7). This process, which is referred to as lipotoxicity, ultimately leads to cell death by  
49 apoptosis in all the cellular systems tested (7).

50 Many animal models of the metabolic syndrome, either genetic or diet-induced, have been described  
51 so far (8). Recently, Lozano *et al.* reported an elegant rat model based on an high-fructose and high-  
52 fat diet (HFHF; (9)). These authors could demonstrate that the combination of high fat and high  
53 carbohydrate induced type 2 diabetes with widespread tissues effects. The phenotype increased  
54 gradually from two month to eight months following the shift to HFHF, with insulin-resistance and  
55 hepatic disorders increasing progressively to reach a maximum at this latter time point. Since with the  
56 increased consumption of sugar-rich and fatty-products, and the increase in preference for such  
57 products, metabolic disorders are becoming more common at a younger age in humans, this model  
58 appears to be very appealing to evaluate the chronology of the impacts of the diet, particularly during  
59 the early onset of the metabolic syndrome.

60 In this context, the present study aimed at evaluating the distribution of fatty acids coming from the  
61 diet within cellular PL within various organs in the HFHF model. We focused in this work on the early  
62 stages of the phenotype set-up. Moreover, the function of the most impacted organs, in terms of fatty  
63 acid distribution, was also evaluated.

## 64 2. Materials and Methods

### 65 2.1 Animals

66 The present study was approved by the Comité d’Ethique et d’Expérimentation Animale (COMETHEA)  
67 and the French Ministère de l’Enseignement Supérieur, de la Recherche et de l’Innovation  
68 (authorization n°2016071215184098). The protocols were designed according to the Guiding  
69 Principles in the Care and Use of Animals approved by the Council of the American Physiological Society

70 and were in adherence with the Guide for the Care and Use of Laboratory Animals published by the US  
71 National Institutes of Health (NIH Publication no. 85-23, revised 1996) and according to the European  
72 Parliament Directive 2010/63 EU.

73 We recapitulated the model developed by Lozano *et al.* (9). Twenty eight male eight week old Wistar  
74 rats (275-299 g), supplied by Envigo (Gannat, France), were housed in a temperature-controlled room,  
75 in a 12-h-light/dark cycle environment with *ad libitum* access to water and food. After one week of  
76 acclimatization, the rats were randomly divided into two groups of 14 rats each. The first group had  
77 free access to a standard diet (CTL) from MUCEDOLA (Settimo Milanese, Italy), with the following  
78 macronutrient composition: 3.0 % fat, 18.5 % protein, 46 % carbohydrate, 6 % fibre, and 7 % ash  
79 (minerals). The second group “High Fat High Fructose” (HFHF) received a purified laboratory  
80 hypercaloric rodent diet “WESTERN RD” (SDS, Special Diets Services, Saint Gratien, France) containing  
81 21.4 % fat, 17.5 % protein, 50 % carbohydrate, 3.5 % fibre, and 4.1 % ash, and additional 25 % of  
82 fructose (Sigma-Aldrich, Saint-Louis, Missouri, USA) in water. Fatty acid distribution within the fat  
83 fraction of both diets is displayed in Supplementary Table 1. In “WESTERN RD”, among fatty acids, the  
84 mono-unsaturated fatty acid Oleate and the saturated fatty acid Palmitate were the most represented  
85 and were found in equal amounts, contributing to 60 % of total fatty acids within the fat fraction.  
86 During the longitudinal observation, body weight was measured each week and plasma glucose,  
87 plasma Triglycerides and plasma Cholesterol levels were determined every 2 weeks at the same time  
88 (2 PM) under random fed conditions. A final experiment was performed 15 weeks after the initiation  
89 of the different diets and plasma glucose, insulin, cholesterol, triglyceride and NEFA levels were  
90 measured after a three hour fasting period to allow gastric emptying. All rats were sacrificed 16 weeks  
91 after starting administration of each diet for further lipidomic profiling and *ex-vivo* experiments.

## 92 [2.2 Biochemical plasma analysis](#)

93 Blood glucose levels were measured using an automatic glucose monitor (One Touch vita - LifeScan  
94 Inc., Milpitas, California, USA). Plasma triglyceride and total Cholesterol concentrations were

95 determined using commercially available colorimetric kits (Sobioda, Montbonnot-Saint-Martin,  
96 France). Plasma free fatty acids were quantified by a colorimetric NEFA kit (Wako Chemicals, Osaka,  
97 Japan). For lipoprotein characterization, plasma samples were collected and subjected to fractionation  
98 by FPLC (ÄKTA pure chromatography system - GE Healthcare Life Sciences, Chicago, Illinois, USA).  
99 Cholesterol and Triglyceride concentrations in each fraction were measured using commercially  
100 available colorimetric kits (Sobioda, Montbonnot-Saint-Martin, France).

### 101 2.3 Lipid Extraction, Phospholipid Purification and Mass Spectrometry Analyses

102 After rats were anesthetized, the organs were quickly removed and put on ice surface. These organs  
103 were cut into small pieces (1-2 mm<sup>3</sup>) and dipped in liquid nitrogen. The frozen pieces were introduced  
104 into cryotubes before immersion in liquid nitrogen for storage at -80°C.

105 Lipids were extracted from each individual sample, according to the following procedure. Each frozen  
106 sample was first submitted to three rounds of grinding using a Precellys Evolution homogenizer (Bertin  
107 Technologies, Montigny-le-Bretonneux, France) and resuspended into 1 ml of water before transfer into  
108 glass tubes containing 500 µL of glass beads (diameter 0.3–0.4 mm; Sigma-Aldrich, Saint-Louis,  
109 Missouri, USA). Lipids were extracted using chloroform/methanol (2:1, v/v) and shaking with an orbital  
110 shaker (IKAH VXR basic VibraxH - Sigma-Aldrich, Saint-Louis, Missouri, USA) at 1500 rpm during at least  
111 1 h, as already described elsewhere (10). The final organic phase was evaporated and dissolved in  
112 100 µL dichloromethane for purification of Phospholipids (PL) on a silica column (Bond ELUT-SI - Agilent  
113 Technologies, Santa Clara, California, USA). Lipid samples were loaded on the top of the column. Non-  
114 polar lipids were eluted by addition of 2 mL dichloromethane and glycolipids with 3 mL acetone. PLs  
115 were then eluted by 2 mL chloroform/methanol/H<sub>2</sub>O (50:45:5, v/v/v).

116 PL analysis in Mass Spectrometry (MS) was performed by a direct infusion of purified lipid extracts on  
117 a Synapt G2 HDMS (Waters Corporation, Milford, Massachusetts, USA) equipped with an Electrospray  
118 Ionization Source (ESI). The mass spectrum of each sample was acquired in the profile mode over 1 min.  
119 The scan range for PL analysis was from 500 to 1200 m/z. PS, PI, PE and its Plasmalogens (PE(P)) species  
120 were analyzed in negative ion mode after the addition of 0.1% (v/v) triethylamine (Supplementary

121 Fig. 1A). PC species were analyzed in positive ion mode after the addition of 0.1% (v/v) formic acid as  
122 already described (10) (Supplementary Fig. 2A). Identification of the various PL species was based on  
123 their exact mass using the ALEX pipeline (11), and on MS/MS fragmentation for structural confirmation  
124 of the polar head (PL class) and the determination of the fatty acid composition. MS/MS experiments  
125 of PI, PS, PE and PE(P) were performed by collision-induced-dissociation (CID) in the negative ion mode.  
126 Examples of obtained MS/MS spectra in the negative ion mode concerning some PLs are presented in  
127 the Supplementary Fig. 1B-D, which shows characteristic fragment ions allowing the identification of  
128 PL structures. MS/MS experiments in negative ion mode also allowed the identification of fatty acid  
129 chains in PC species as shown in Supplementary Fig. 2C. MS/MS spectrum in positive ion mode led to  
130 the identification of the polar head of PC class (characteristic and prominent fragment for all PC species  
131 with  $m/z$  184, as shown in Supplementary Fig. 2B).

132 Complementary experiments were also conducted on muscle and liver samples on non-purified lipid  
133 extracts in positive ion mode with a scan range from 300 to 1200  $m/z$  to detect the neutral lipid species  
134 like Cholesterol, Diglycerides (DG) and Triglycerides (TG) (Supplementary Fig. 12). The structure of these  
135 compounds was confirmed based on the exact mass using the ALEX pipeline (11) and on MS/MS  
136 fragmentation of main species. All spectra were recorded with the help of MassLynx software (Version  
137 4.1, Waters). Data processing of MS/MS spectra in this work was carried out with Biovia Draw 19.1©  
138 and MassLynx© software, with the help of Lipid Maps Lipidomics Gateway®  
139 (<https://www.lipidmaps.org/>)

140

## 141 2.4 Exercise

142 To determine the diet feeding's effect on the functional capacity of rats, a maximal exercise test was  
143 used (12). In this test, 15 rats (CTL and HFHF groups, 7 and 8 per groups respectively) ran on a treadmill  
144 (Exer3/6 Treadmill - Columbus Instruments, Columbus, Ohio, USA) during five minutes at  $13 \text{ m}\cdot\text{min}^{-1}$   
145 at a grade of 10 degrees, and the speed was increased by  $3.6 \text{ m}\cdot\text{min}^{-1}$  every two minutes until the

146 animals were exhausted. At this time, the speed measured was their Maximum Running Speed (MRS).  
147 The week before the first MRS test, a treadmill habituation session was performed.

## 148 2.5 Muscles preparation and contraction measurement

149 EDL and Soleus muscles were carefully dissected with tendons intact on both ends and then vertically  
150 tied between a fixed hook at the bottom of the water jacketed 100 mL chamber (EmkaBATH2 - Emka  
151 Electronique, Noyant-la-Gravoyère, France) and the force transducer (MLTF500ST - ADInstruments,  
152 Dunedin, New Zealand) by means of cotton threads. Before experiments, muscles were maintained for  
153 10 min into the 25°C physiological solution chamber, under oxygenated conditions (95% O<sub>2</sub> and 5%  
154 CO<sub>2</sub>). The physiological solution (Krebs solution) contained (in mmol/L.): 120 NaCl, 5 KCl, 2 CaCl<sub>2</sub>,  
155 1 MgCl<sub>2</sub>, 1 NaH<sub>2</sub>PO<sub>4</sub>, 25 NaHCO<sub>3</sub>, and 11 glucose) and pH was 7.4. The isometric tension was recorded  
156 by means of the transducer through a module (PowerLab 2/26 - ADInstruments, Dunedin, New  
157 Zealand) driven by the LabChart7 software (ADInstruments, Dunedin, New Zealand). Electrical external  
158 field stimulation was delivered through a constant current stimulator (STM4 - Bionic Instruments,  
159 Grenoble, France) and a pair of platinum electrodes (Radnoti, Terenure, Ireland) flanking both sides of  
160 the isolated muscle. Optimum stimulation conditions and muscle length were established in the course  
161 of preliminary experiments. In our device setup, supramaximal stimulation amplitude proved to be  
162 200 mA for 1 ms, and the optimum length achieved for a resting pre-tension of 2 g.  
163 The force-frequency relation was achieved by increasing step by step the frequency of iterative  
164 stimulation current pulses (supramaximal amplitude and duration indicated above) as follows: 2, 5, 15,  
165 25, 40, 50, 75, 100 Hz. Each sequence of multiple pulses was applied, for EDL, for 1s followed by a  
166 relaxing period of 1s and, for Soleus, for 2s followed by a 1 s relaxing period. The absolute force was  
167 measured as amplitude at end of the pulse and normalized to the muscle weight (in N/g of muscle).  
168 The assessment of muscle fatigue was achieved by performing force-frequency relation protocol  
169 before (pre-fatigue) and 30 s after (post-fatigue) a fatigue protocol consisting of 30 successive sets of  
170 stimulations at 100 Hz.



## 171 2.6 Contraction measurement on isolated aortic rings

172 The thoracic aorta of rats was removed and placed into Krebs solution containing (in mM): 120 NaCl,  
173 4.7 KCl, 2.5 CaCl<sub>2</sub>, 1.2 MgCl<sub>2</sub>, 1.2 KH<sub>2</sub>PO<sub>4</sub>, 15 NaHCO<sub>3</sub>, 11.1 D-glucose, pH 7.4. After separation of  
174 connective tissues, the thoracic segment of aorta was cut into rings of 3mm in length. Rat aorta rings  
175 were mounted between a fixed clamp at the base of a water-jacketed 5 ml organ bath contained an  
176 oxygenated (95% O<sub>2</sub> and 5% CO<sub>2</sub>) Krebs solution and an IT1-25 isometric force transducer (Emka  
177 Technologies, Paris, France; (13, 14)). All experiments were performed at 37°C. A basal tension of 2 g  
178 was applied in all experiments. During 1 h, tissues were rinsed three times in Krebs solution and the  
179 basal tone was always monitored and adjusted to the range 400-1000 mg (15). 1 μM norepinephrine  
180 (denoted NE) was used to evoke the sustained contractile response.

## 181 2.7 Langendorff perfusion analyses

182 A left ventricular balloon system allows for real-time monitoring of the pressure developed by the  
183 contractile left ventricle of hearts mounted in a Langendorff set-up. To achieve this goal, control or  
184 HFHF rats were anaesthetized by intraperitoneal injection of sodium pentobarbital (60 mg/kg). The  
185 heart was quickly removed and the ascending aorta was connected according to the Langendorff  
186 technique (16) and a 0.06 ml latex balloon (VK 73-3479) was inserted in the left ventricle.  
187 The balloon was connected to a pressure transducer which was linked to the data acquisition system  
188 (PowerLab 425 - ADInstruments, Dunedin, New Zealand). Hemodynamic and functional parameters  
189 were recorded on a personal computer using LabChart software (ADInstruments, Dunedin, New  
190 Zealand). Hearts were allowed to stabilize during 30 minutes while perfused with standard Krebs  
191 solution. Functional parameters were assessed before, during and after a 30 minute-long ischemic  
192 insult. Preischemic period consisted in ventricular pressure monitoring in standard perfusion  
193 conditions during 10 minutes (Supplemental Fig. 14). Then, ischemia was induced by complete  
194 cessation of coronary flow during 30 minutes (global ischemia). At the end, reperfusion was initiated

195 by re-establishing coronary flow and cardiac parameters were recorded and analyzed during the  
196 subsequent 30 minutes.

## 197 2.8 Statistical analysis

198 P values were calculated either by two-tailed *t*-tests or ANOVA, completed by adequate post-tests, as  
199 indicated the corresponding figure legends. All analyses were performed using the Graphpad Prism 5  
200 software. ns: non-significant; \*\*\*\*P < 0.0001, \*\*\*P < 0.001, \*\*P < 0.01 and \*P < 0.05.

## 201 3. Results

### 202 3.1 Metabolic follow-up

203 After 5 weeks of diet, HFHF induced a significant increase in body weight ( $p < 0.05$ ) maintained until  
204 the end of the study, in comparison to standard diet (CTL; Fig. 1A). Alterations in Glucose homeostasis  
205 were visible from the sixth week under HFHF (Fig. 1B). The HFHF rats also developed a dyslipidemia  
206 with a significant increase in blood of Triglyceride and Cholesterol levels as early as 2 and 4 weeks of  
207 age, respectively (Fig. 1C and 1D). These data recapitulated the observations from Lozano *et al.* (9). At  
208 15 weeks, additional metabolic measurements were performed on 12 rats after prior gastric emptying  
209 (6 control and 6 HFHF; see below), and all animals were sacrificed to perform the phospholipid analyses  
210 and the *ex-vivo* experiments described below.

### 211 3.2 Fatty acid distribution within phospholipids varies depending on the organ

212 In a first step, we determined the fatty acid distribution within the different phospholipid species (PL),  
213 namely PhosphatidylCholine (PC), PhosphatidylEthanolamine (PE), PhosphatidylSerine (PS) and  
214 Phosphatidylinositol (PI) in various organs from rats under a standard diet (CTL). This study was  
215 completed by the analysis of Plasmalogens which correspond to specific glycerophospholipids species  
216 containing a vinyl-ether bond at the *sn*-1 position (4). Among this lipid class, ethanolamine  
217 plasmalogens (PE(P)) are found in all rat organs ((4) and see below), whereas choline plasmalogens,  
218 which can be found in significant amounts in specific human tissues, are only detected as traces in rat

219 organs ((4) and our unpublished data). The present study was performed on known targets of  
220 metabolic syndrome-induced disorders, such as the liver, skeletal muscles (EDL and Soleus), the  
221 vascular system (heart and aorta) and the pancreas, and was completed by the same analyses on the  
222 brain, spleen and lung. In this aim, total PL were extracted from the various organs and analyzed by  
223 mass spectrometry, in both the positive and negative ion modes, as described in the “Materials and  
224 Methods” section. Examples of characteristic spectra obtained in the negative and positive ion modes  
225 are displayed in Supplementary Fig. 1 and Fig. 2, respectively. The results obtained for PC are displayed  
226 in Fig. 2 as radar graphs and Supplementary Fig. 3 as histograms, and the data corresponding to PE, PS,  
227 PI and PE(P) are shown in Supplementary Fig. 4 to 7. In these figures, PL species are denominated by  
228 their initials followed by the total number of carbons and the number of carbon–carbon double bonds  
229 in their acyl chains (as an example, PC 38:4 corresponds to a PhosphatidylCholine bearing 38 carbon  
230 atoms and four double bonds in its acyl chains).

231 As already described in previous studies (17), a first observation is that PC is the PL species which  
232 displays the widest variations in terms of fatty acid chain distribution depending on the organ  
233 considered (Fig. 2 and Supplementary Fig. 3), whereas PI essentially appears as a major species (PI  
234 38:4) in all the organs studied (Supplementary Fig. 4).

235 Concerning PC, it clearly appears that some organs are particularly enriched in species bearing  
236 polyunsaturated fatty acid chains (PUFA; more than two double-bonds/unsaturations in their fatty acid  
237 chains; *e. g.* PC 38:4), whereas others preferentially contain PC with two saturated fatty acyl chains (*e.*  
238 *g.* PC 32:0) (Fig. 2).

239 To visualize better these variations, the Double-Bond (DB) index was calculated in each case (Fig. 3A).  
240 As shown, the liver, skeletal muscles and the cardiovascular system were particularly enriched in PUFA-  
241 containing PC species (DB>2). By contrast, the spleen, the brain and the lung contained remarkably  
242 high amounts of saturated PC species (DB=0). The brain also differentiated from other organs by its

243 high levels of monounsaturated PC species (DB=1). In the latter case, PC 34:1 appeared as the major  
244 species. Pancreas also displayed a very characteristic signature, with high levels of DB=2 PC.

245 Among PUFA, important variations could also be observed depending on the organ considered (Fig. 2  
246 and Fig. 3A). If Arachidonic Acid (AA; 20:4) appeared as the most represented fatty acid in pancreas,  
247 spleen, liver, lung and the cardiovascular system, as combinations with Palmitate (PC 36:4) or Stearate  
248 (PC 38:4; Fig. 2; Table 1), Docosahexaenoic Acid (DHA; 22:6) was exquisitely enriched in skeletal  
249 muscles, in combination with Palmitate (PC 38:6; Fig. 2; Table 1).

250 PE differentiated from PC in the sense that PUFA-containing species were systematically dominant,  
251 whatever the organ considered (Supplementary Fig. 5 and 9 A). However, the DHA to AA balance  
252 greatly varied among organs. As already observed for PC, DHA was particularly enriched in skeletal  
253 muscles, where PE 40:6 was the most represented species. Interestingly, DHA was also the most  
254 prominent PUFA in the brain, a situation very different of PC behavior in this organ (Fig. 2 and Fig. 3A).  
255 In the heart, whereas very similar signatures were observed in PC for ventricles and atria, PE 40:6 was  
256 enriched in the ventricles as compared to these latest. Even if less marked than with PC, the brain,  
257 spleen and lung appeared as the most saturated PE organs and the pancreas as the most DB=2 enriched  
258 organ.

259 The fatty acid distribution within PS paralleled the one observed with PE (Supplementary Fig. 6 and  
260 Supplementary Fig. 10 A), with PUFA being the major fatty acids in all the organs considered. Again,  
261 DHA was the most represented PUFA in skeletal muscles, brain, ventricle and atrium (PS 40:6), whereas  
262 AA was the most abundant in other organs (PS 38:4). The pancreas differentiated from others by a  
263 wider distribution of the fatty acyl chains, and relatively high levels of DB=2 species.

264 As already described elsewhere (4), PE(P) were detected in all the organs analyzed in this study, where  
265 they constituted between 30 and 56 % of ethanolamine-containing glycerophospholipids (*i. e.* PE and  
266 PE(P)), at the exception of the liver, in which their level dropped to 7 % only (data not-shown).  
267 Whatever the organ considered, PUFA-containing species were the most prominent (Supplementary

268 Fig. 7 and 11A), with, as for PE and PS, a selective enrichment in DHA in the brain, the ventricle and  
269 skeletal muscles.

270 To summarize, all the organs studied here displayed very characteristic fatty acid distributions within  
271 PL and, therefore various saturation rates: they can be classified as DB=0/saturated organs (Spleen,  
272 lung), DB=1 (Brain), DB=2 (Pancreas) and DB>2 organs (liver, muscle and cardiovascular system).  
273 Among the latter, one can differentiate AA- (liver and Cardiovascular system) and DHA-enriched  
274 (skeletal muscle) organs. The brain is the organ which displays the most discrepancies between PL, PC  
275 being predominantly DB=2, whereas PE and PS are essentially DHA-enriched. These observations  
276 match and complete previous observations made by others (17).

### 277 3.3 Phospholipid species are differently affected by the High fat/High Fructose (HF/HF) 278 diet, in an organ-specific manner

279 The high-fat diet used in this study is exquisitely enriched in SFA and MUFA, and specially Palmitate  
280 (16:0) and Oleate (18:1) (Table S1). Surprisingly, PE, PE(P), PS and PI all appeared to be quite insensitive  
281 to this oversupply, their overall fatty acid profile remaining similar whatever the diet (Supplementary  
282 Fig. 4 to 11).

283 By contrast, PC was the most affected class, but in a very selective organ-specific manner, the liver and  
284 the muscles being the most affected organs (Fig. 2 and 3B). In these tissues, DB=1 species appeared to  
285 be increased (PC 32:1 and PC 34:1 in the liver; PC 34:1 in muscles), at the expense of PUFA-containing  
286 species (PC 36:4 and PC 38:4 in the liver; PC 36:4 and PC 38:6 in muscles; Fig. 2). Notably, the same  
287 tendency was observed for PE and PS, but to lower levels and below significance (Supplementary Fig.  
288 5, 6, 9 and 10).

289 Tandem MS experiments provided more information about fatty acid composition of PC species (for a  
290 representative example, see Supplementary Fig. 2C). As shown in Table 1, a closer look to MS/MS  
291 analyses revealed that, in muscles, PC species have the same composition of fatty acids (the same PC

292 subspecies) in CTL and HFHF diets. Furthermore, MS results showed that PC(16:0/18:1) clearly  
293 accumulated at the expense of AA- (PC(16:0/20:4)) and DHA- (PC(16:0/22:6)) containing species under  
294 the HFHF diet (Fig. 2). This result reflected the fatty acid composition of the HFHF diet, which is not  
295 only enriched in 16:0 and 18:1, but also contains lower amounts of Linoleic (18:2) and Linolenic (18:3)  
296 acids, being respectively the precursors for AA (20:4) and DHA (22:6), than the standard diet.

297 By contrast, in the liver, the situation appeared to be more complex than expected. Indeed, increased  
298 amounts of PC 32:1 and PC 34:1 could be partly accounted in this organ by the apparition of PC species  
299 that were not detected in the liver of the rats under the standard diet, namely PC(14:0/18:1) and  
300 PC(16:1/18:0) (Table 1). Notably, 14:0, 16:1 and 18:0 are also enriched in the HFHF diet (Table S1).  
301 Moreover, decreased amounts of PC 36:4 et PC 38:4 were not only related to a global decrease in AA-  
302 containing species, but were also accompanied with the formation of new species, namely  
303 PC(18:2/18:2) and PC(18:1/20:3), respectively (Table 1).

304 To summarize, two main organs appear to be highly reactive to the selective fatty acid-enrichment  
305 from the diet, namely the liver and skeletal muscles. Palmitate and Oleate preferentially distribute  
306 within PC under the form of PC 34:1. Moreover, a decrease in the amount of PUFA-containing species  
307 can also be observed in the same organs. This can be explained, at least for AA-containing species, by  
308 decreased amounts of the relevant precursor (namely Linoleic acid) in the HFHF diet.

### 309 3.4 Lipotoxicity in the liver

310 Among the various tissues, liver clearly appeared to be one of the main targets of diet-induced fatty-  
311 acid rearrangements in PL (Fig. 2 and 3). This was not a surprising observation, since the liver plays a  
312 key role in lipid metabolism, as the hub of fatty acid synthesis and lipid circulation through lipoprotein  
313 synthesis (18). In the HFHF model (9), alterations in liver function were manifested as early as 2 months  
314 following the shift to the enriched diet. The main manifestations at this early time point were the  
315 induction of steatosis, with a steatosis score of 1–2, according to Kleiner *et al.* (19), and increased  
316 hepatic levels of Reactive Oxygen Species (ROS). In the present study, we could also show that 4

317 months of HFHF resulted in a significant increase in liver weight (Fig. 4A), and in the amounts of  
318 circulating lipids, including Triglycerides (Fig. 4B), Cholesterol (Fig. 4C) and Non-Esterified Free Fatty  
319 Acids (NEFA; Fig. 4D). Analysis of the lipoprotein profile by Fast Protein Liquid Chromatography (FPLC)  
320 revealed that HFHF rats displayed increased plasma concentrations of lipoproteins rich in cholesterol  
321 (LDL and HDL; Fig. 4E). Moreover, we could also note an increase in Triglyceride levels within  
322 Chylomicrons / VLDL (fractions 3 to 10) and within LDL / HDLs (fractions 20 to 50, Fig. 4F).  
323 Since hepatic deposition of neutral lipids is a hallmark of steatosis, we also evaluated if such a  
324 deposition could be visualized in the HFHF model. In this aim, MS analyses were performed on non-  
325 purified lipid extracts from liver samples (Supplementary Fig. 12). As shown, clear-cut accumulations  
326 of Triglycerides (TG), Diglycerides (DG) and Free Cholesterol could be visualized in the liver of HFHF  
327 rats (Supplementary Fig. 12). These observations were confirmed with another analytical method, *i. e.*  
328 thin layer chromatography of hepatic neutral lipid fractions (Supplementary Fig. 13). These  
329 observations confirmed the previous data from Lozano et al. (9), showing a significant increase in TG  
330 in this organ as early as 2 months following induction of the HFHF diet, a situation which was  
331 maintained after 8 months. Interestingly, selective TG and DG species appeared to accumulate in the  
332 liver under HFHF, the main ones being TG(52:2), TG(54:5), DG(34:1) and DG(36:2) (Supplementary  
333 Fig. 12). Complementary MS/MS analyses (our unpublished data) revealed that these lipids  
334 corresponded to 16:0- and 18:1- containing species, namely TG(16:0/18:1/18:1), TG(16:0/18:1/20:4),  
335 DG(16:0/18:1) and DG(18:1/18:1), therefore reflecting the fatty acid composition of the HFHF diet.

### 336 3.5 Lipotoxicity and muscle function

337 With the liver, muscles were the most affected tissues in terms of their sensitivity to fatty acid  
338 rearrangements within PL (Fig. 2 and 3). Interestingly however, by contrast to liver, this redistribution  
339 was not paralleled by the deposition of neutral lipids (TG, DG and Cholesterol; Supplementary Fig. 12  
340 and 13). Fatty acid rearrangements corresponded to a decrease in the amounts of DHA containing PC  
341 species (namely PC 38:6), a lipid species that was exquisitely enriched in these tissues (Fig. 2; Table 1).

342 Notably, the same observations could be done in either the fast-twitch (EDL) and slow-twitch (Soleus)  
343 types of muscles (Fig. 2).

344 Obesity can cause a decline in contractile function of skeletal muscle. Isolated muscle preparations  
345 show that obesity often leads to a decrease in force produced per muscle cross-sectional area, and  
346 power produced per muscle mass (20).

347 We therefore investigated further the effects of HFHF diet on the functional features of both fast-  
348 twitch and slow twitch skeletal muscles. In this aim, the fast-twitch extensor digitorum longus muscles  
349 (EDL) and the slow twitch Soleus muscles (Soleus) were isolated from rats under both diets. A first  
350 observation was that absolute mass of these skeletal muscles was increased under the HFHF diet (Fig  
351 5A and 5B).

352 In a next step, Soleus and EDL were stimulated with field electrodes to measure force characteristics  
353 in two different states: before fatigue (pre-fatigue) and immediately after a fatigue protocol (post-  
354 fatigue) (Fig. 5 C-D).

355  
356 Figure 5C displays examples of tetanus force responses, relative to muscle mass, in EDL and Soleus  
357 muscles from control CTL and HFHF rats in the two pre- and post-fatigue stimulation conditions. In  
358 these examples, force was classically found weaker in CTL Soleus muscle than in EDL CTL muscles in  
359 pre-fatigue conditions (mean values: EDL:  $4.5 \pm 0.6$ , Soleus  $3.4 \pm 0.3$  N/g). Tetanic force was found  
360 impaired by HFHF diet in EDL muscles and a reduction, but with less impact, was also observed in  
361 Soleus (Fig. 5C). When we analyzed the force-frequency curves (Fig. 5D), for both EDL and Soleus  
362 muscles, the HFHF diet (red curves) resulted in a decreased muscle tetanic force, compared with CTL,  
363 starting at stimulation frequencies greater than 40 Hz - 50 Hz (At 100 Hz, EDL:  $2.6 \pm 0.8$  N/g in HFHF  
364 versus  $4.5 \pm 0.6$  N/g in the CTL group, Soleus:  $1.5 \pm 0.3$  N/g in HFHF versus  $3.4 \pm 0.3$  N/g in the CTL  
365 group). These findings indicate that a HFHF diet impairs contractile force in both fast-twitch and slow  
366 twitch muscles.



367 Moreover, a significant impairment of tetanic force after fatigue protocols was observed. At 100 Hz, in  
368 CTL EDL muscle, fatigue protocol led to a 82 % decrease (from  $4.5 \pm 0.6$  to  $0.8 \pm 0.1$  N/g) of tetanic  
369 force and such a decrease reached 85 % in HFHF EDL (from  $2.6 \pm 0.8$  to  $0.4 \pm 0.1$  N/g). The same effect,  
370 at a lesser extent, was recorded in Soleus: 32 % (from  $3.4 \pm 0.3$  to  $2.3 \pm 0.2$  N/g) in CTL and 39% (from  
371  $1.5 \pm 0.3$  to  $0.9 \pm 0.2$  N/g) in HFHF.

372 To conclude, adaptations occurring in response to HFHF diet result in a general muscle force loss  
373 consistent with that observed in humans (21). These findings would imply that HFHF diet induces a  
374 drastic decrease of the tetanus force whatever the type of muscle and without significantly changing  
375 the behaviour towards fatigue.

### 376 3.5 Lipotoxicity and the cardiovascular system

377 By contrast to the liver and skeletal muscles, the cardiovascular system appeared to be quite protected  
378 from diet-induced fatty acid redistribution within PL (Fig. 2 and Fig. 3).

379 However, since many evidences exist on the relationship between obesity and cardiovascular disease  
380 (CVD) in humans, even if the degree and the duration of obesity appears to affect the severity of CVD  
381 (22), we decided to evaluate further the impacts of the HFHF diet on the cardiovascular system.

382

383 First, a maximal exercise test was used as an indicator of the cardio-respiratory capacity of rats.  
384 Interestingly, the Maximum Running Speeds (MRS) of the CTRL and the HFHF group were not  
385 significantly different post-diet, with values of  $27.8 \pm 0.83$  and  $29.4 \pm 0.61$  m/min, respectively (Fig.  
386 6A). Therefore, HFHF clearly did not impair the global functional capacity of the animals.

387 Obese subjects with insulin resistance and hypertension have abnormal aortic elastic function, which  
388 may predispose them to the development of left ventricular dysfunction (23). In this context, we  
389 compared the basal tone on control and HFHF rat aorta, but we observed no difference between the  
390 two types of aorta rings (Fig. 6B). The norepinephrine (denoted NE)-induced vasoconstriction was also  
391 similar on control and HF/HF rat rings (Fig. 6B).

392 Direct cardiac structural abnormalities and alterations in ventricular function have been shown to  
393 occur in severely obese patients and in a process that may predispose them to heart failure. More  
394 specifically, left ventricular (LV) hypertrophy in severe obesity (either eccentric or concentric) is  
395 frequently observed and the direct implication of metabolic disturbance, including Lipotoxicity, has  
396 been suggested (22).

397 The left ventricular balloon system allows for real-time monitoring of the pressure developed by the  
398 contractile left ventricle of hearts mounted in a Langendorff set-up. Rat hearts from either control  
399 (n=11) or HFHF (n=12) groups were submitted to the protocol illustrated in Supplementary Fig. 14.  
400 Parameters recorded during the pre-ischemic period (Fig. 6C) are illustrated in Fig. 6D, which shows  
401 that no significant difference was found between the two groups, whatever the parameter under  
402 consideration. In other words, the contractile behavior of rat hearts was not impacted by the feeding  
403 diet imposed to rats during the 15 weeks preceding the experiment.

404 When the hearts from both groups were submitted to global ischemia (Supplementary Fig. 15),  
405 contractile performances rapidly decreased until developed pressure completely vanished. Again, no  
406 significant difference was observed between control and HFHF rats, whatever the recorded parameter.  
407 When perfusion was restored, as illustrated in Supplementary Fig. 15, cardiac performance was rapidly  
408 recovered. It seems that there is a tendency of hearts from control rats to recover better than HFHF  
409 hearts during reperfusion. However, this tendency only reaches statistical significance for LVDP at 1  
410 and 5 min following reperfusion onset, all the other values remaining non-significantly different  
411 between the two groups (Supplementary Fig. 15).

412

413 To conclude, the cardiovascular system appeared to be functionally protected during the early onset  
414 of the metabolic syndrome under the HFHF diet in our conditions.

## 415 4. Discussion

416 It is known since a long time that the fatty acid composition of the diet can influence Phospholipid  
417 signature in various tissues (For review, see (24)). However, an important conclusion from the present  
418 study is that not all organs are equal to this redistribution. Indeed, in the HFHF rat model, most organs  
419 were protected from fatty acid rearrangements, at least during the early onset of the metabolic  
420 syndrome, with the liver and skeletal muscles being the preferred targets (Fig. 2 and Fig. 3). A second  
421 important conclusion of the present study is that fatty acids from the diet can distribute within PL in a  
422 very selective way: PC appears to be the preferred sink for this distribution.

423 In the liver, this distribution was paralleled by the deposition of neutral lipids, including Di- and Tri-  
424 glycerides, Cholesterol and Steryl-esters (Supplementary Fig. 12 and 13). Hepatic deposition of neutral  
425 lipid is a hallmark of dyslipidemia in obesity and it has been proposed to promote hepatic insulin  
426 resistance associated with nonalcoholic fatty liver disease (NAFLD), which is a major factor in the  
427 pathogenesis of type 2 diabetes and the metabolic syndrome (25, 26). As observed for PC, the main  
428 TG and DG species which accumulated in this organ corresponded to the ones containing the fatty  
429 acids which are specifically enriched in the HFHF diet used in this study, *i. e.* 16:0 and 18:1  
430 (Supplementary Table 1): PC(16:0/18:1) (Table 1), TG(16:0/18:1/18:1), TG(16:0/18:1/20:4),  
431 DG(16:0/18:1) and DG(18:1/18:1) (Supplementary Fig. 12). Interestingly, in obese individuals, DG  
432 can inhibit insulin signaling by activation of Protein Kinase C (PKC) isoforms (26). In these patients, and  
433 as in the HFHF model, hepatic DG composed of 16:0/18:1 and 18:1/18:1 are most abundant and also  
434 strongly related with insulin resistance (26). Accordingly, HFHF resulted in the present study in a  
435 significant increase in the concentrations of circulating Glucose (Fig. 1B) and Insulin (data not-shown),  
436 confirming previous data from Lozano *et al.* (9) showing that after 2 months, the HOMA2-IR  
437 (homeostasis model assessment) values were higher than 2.4 in HFHF rats. These data demonstrated  
438 insulin resistance in this model, at a very early stage in the onset of the metabolic syndrome. To

439 summarize, similar lipid depositions/rearrangements are observed in the liver of obese individuals and  
440 of HFHF rats, with likely similar impacts on the initiation of the insulin-resistance phenotype.

441 If the impacts of HFHF on the liver were not a surprising observation, since this organ plays a key  
442 role in lipid metabolism, the fact that skeletal muscles were the second most affected tissues in terms  
443 of PC fatty acid rearrangements was less predictable (Fig. 2). Importantly, by contrast to liver, this  
444 redistribution was not paralleled by deposition of neutral lipids in these tissues (Supplementary Fig. 12  
445 and 13).

446 Obesity is generally associated with changes in muscle quality, as it appears to result in larger muscles  
447 of lower quality (*i. e.* less contractile force per unit of cross sectional area and lower power output per  
448 unit of muscle mass), which have the same absolute force and power output of smaller muscles in lean  
449 individuals (20). The exact same observations were made in the present study, HFHF resulting in  
450 absolute increases in EDL and Soleus masses (Fig. 5A and 5B), but reduced force per muscle mass (Fig.  
451 5C and 5D). Increase in muscle mass likely compensates poor muscle quality, at least in the early onset  
452 of the metabolic syndrome, as manifested by the similar performances of the HFHF rats in the maximal  
453 exercise tests (Fig. 6A). If the connection between muscle force and the observed decrease in PUFA-  
454 containing PL remains correlative at this step, knowing the importance of such lipid species in  
455 membrane plasticity/elasticity (6, 27), additional experiments aiming at studying the intimate  
456 relationships between the levels of PUFA-enriched PL, the membrane properties of muscle cells and  
457 their ability to stretch/contract, will undoubtedly shed new lights on these mechanisms.

458 Finally, the fact that the cardiovascular system (CS) was protected from fatty-acid rearrangements  
459 within PL and remained largely unaffected on a functional point of view was also an unexpected result.  
460 These observations suggest that protective mechanisms under dyslipidemia do exist to channel excess  
461 fatty acids to skeletal muscles rather than to CS. It has been demonstrated that the prognosis of  
462 Cardiovascular diseases (CVD) of a patient who just became obese might be different from another  
463 who has been obese for many years (22). In a pioneering study, Nakajima *et al.* (28) demonstrated that

464 alterations of cardiac performance in obese individuals is attributed not only to the excess of body  
465 weight but also to the duration of obesity. Long lasting experiences to evaluate the impacts of HFHF  
466 on the CS, both on PL fatty acid signature and overall performance will undoubtedly help to establish  
467 clearer connections between these processes.

468 To conclude, this study is, to our knowledge, the first of its kind to give such an overview of the  
469 distribution of fatty acids originating from the diet within PL in various organs and their functional  
470 performances. Further studies aiming at establishing direct links between PL fatty acid composition,  
471 relevant membrane properties in targeted cells, and organ function, particularly in the later steps of  
472 the metabolic syndrome, will undoubtedly help at understanding the impacts of lipotoxicity on the  
473 progression of the associated diseases/comorbidities in this complex pathology.

## Acknowledgements

This work has benefited from the facilities and expertise of the Therassay facility (University of Nantes, France). In this context, Dr. Cédric Le May and Dr. Maud Chétiveaux are acknowledged for their precious help and expertise in the determination of the metabolic parameters displayed in this study. The team from the PreBios facility (University of Poitiers, France) is also acknowledged for taking care of the animals during the course of this study. This work was supported by the Ministère de l'Éducation Nationale, de l'Enseignement Supérieur et de la Recherche (French MENRT) and the FEDER (Fonds Européen de Développement Régional), with grants to L. K. and A. B.

## Competing Interests

The authors declare no competing or financial interests.

## 5. Figure legends

### Figure 1: Longitudinal measurements (random fed conditions) performed during the study

During the longitudinal observation, body weight was measured each week (A) and plasma glucose (B), plasma Triglycerides (C) and plasma Cholesterol (D) levels were determined every 2 weeks at the same time of the day (2 PM) under random fed conditions, according to the protocols described in the “Materials and Methods” section, for CTL and HFHF rats ( $n = 8$ ). Data are presented as means  $\pm$  SD. Parameters were compared between CTL and HFHF rats using unpaired t-test.

### Figure 2: PC species distribution in various organs as a function of the diet.

Total lipids were extracted and phospholipid species were purified and analyzed by ESI-MS from samples corresponding to the indicated organs obtained either rats fed with a normal (CTL) or HFHF diet (HFHF), as described in the “Materials and Methods” section. PC subspecies distribution in each case are displayed. The total carbon chain length ( $x$ ) and number of carbon-carbon double bounds ( $y$ ) of the main PC molecular species ( $x:y$ ) are indicated. Values are means  $\pm$  S.D. of four independent determinations from four individuals from both groups in each case.

Statistical analysis was performed using two-way ANOVA, completed by Bonferroni post-tests to compare means variations between the two groups of animals for each PC subspecies. Significant differences between CTL and HFHF are indicated (\*\*\*\* $P < 0.0001$ , \*\*\* $P < 0.001$ , and \*\* $P < 0.01$ ), either in green if a specific subspecies is decreased under the HFHF diet as compared to CTL, or in red if this subspecies is increased under the HFHF regimen.

### Figure 3: PC Double-Bond (DB) index and DHA to AA ratios in various organs as a function of the diet.

Total lipids were extracted and phospholipid species were purified and analyzed by ESI-MS from samples corresponding to the indicated organs, obtained either rats fed with a normal (CTL) or HFHF diet (HFHF), as described in the “Materials and Methods” section. The relative percentage of saturated (DB=0: no double bonds) versus monounsaturated (DB=1: one double bond), diunsaturated (DB=2: two double bonds) and polyunsaturated (DB > 2: > two double bonds) phosphatidylcholine (PC) species was obtained from the PC subspecies distribution displayed in Fig. 2. The ratio of Docosahexaenoic Acid (DHA)- to Arachidonic Acid (AA)-containing PC subspecies in the various organs is also displayed.

#### Figure 4: Impacts of the diet on liver function

Livers from rats fed with either a standard (CTL) or a HFHF diet (diet) for 15 weeks were dissected and weighted, and the Liver/Total weight ratio was determined (A). 15 weeks after the initiation of the different diets, plasma Triglycerides (B), Cholesterol (C) and NEFA (D) levels were measured after a three hour fasting period to allow gastric emptying. In parallel, plasma samples were collected and subjected to fractionation by Fast Protein Liquid Chromatography (FPLC) and Cholesterol (E) and Triglyceride (F) concentrations in each fraction were measured. See the “Materials and Methods” section for details. All determinations were performed on 6 rats from each group. Values are means  $\pm$  S.D. Parameters were compared between CTL and HFHF rats using unpaired *t*-test.

#### Figure 5: Impacts of the diet on the function of skeletal muscles

15 weeks after the initiation of the different diets (CTL or HFHF), plasma Glucose (A) and Insulin (B) levels were measured after a three hour fasting period to allow gastric emptying, as described under the “Materials and Methods” section (n = 6). At the same time point, the EDL (C) and Soleus (D) muscles were dissected and their weight was determined for comparison between CTL and HFHF rats (n = 11). Values are means  $\pm$  S.E.M. Parameters were compared between CTL and HFHF rats using unpaired *t*-test (A-D).

Effects of HFHF diet on tetanus amplitude and fatigue of EDL and Soleus muscle (F and G). Examples of tetanus responses to electrical field stimulation at 100 Hz for EDL (left panel) and Soleus (right panel) before and after a fatigue protocol in control (blue traces) and HFHF (red traces) rats (F). Force-frequency relationships for the same types of muscle than in F (G). Values are means  $\pm$  S.E.M. Statistical tests were performed using one-way analysis of variance and a Dunnett’s multiple comparison as post test.

#### Figure 6: Impacts of the diet on the Cardiovascular System

The Maximal Running Speed (MRS) was determined 15 weeks after the initiation of the different diets (CTL (n = 7) or HFHF (n = 8)) (A). At the same time point, the basal tone and the induced-contraction was measured on rat aorta rings (B). Aorta rings obtained from four control and five HF/HF rats were mounted between a fixed clamp and incubated in Krebs solution to determine the basal tone (Left panel). 1  $\mu$ M Norepinephrine (denoted NE) was added to the same aorta rings to evoke the sustained contractile response (Right panel).

The pressure developed by the contractile left ventricle of the animals was also determined using a Langendorff set-up (C and D). Rat hearts from either control (n=11) or HFHF (n=12) groups were submitted to the protocol illustrated in Supplementary Fig. 10. Parameters recorded during the whole protocol are illustrated in C). The results obtained during pre-ischemic period are presented in D) as mean  $\pm$  SEM. Pre-ischemic parameters were compared between CTL and HFHF rats using unpaired *t*-test.

#### Table 1: Distribution of the various PC subspecies in the liver and soleus as a function of the diet

PC studies were obtained after fragmentation studies (MS/MS) of the indicated PC species, as described in the “Materials and Methods” section and exemplified in Supplementary Fig. 2C. Subspecies that appeared to be increased or decreased under the HFHF diet as compared to the Normal diet (CTL) are indicated in Red and Green, respectively, based on the relative proportions of the various corresponding PC species obtained from direct infusion of lipid extracts, as displayed in Fig. 2. The relative quantities of the various subspecies corresponding to a given PC species are indicated by different font sizes.

|                   | <b>Liver</b>                 |                              |
|-------------------|------------------------------|------------------------------|
| <b>PC species</b> | <b>CTL</b>                   | <b>HFHF</b>                  |
| <b>PC(32:1)</b>   | PC(16:0/16:1)                | PC(16:0/16:1), PC(14:0/18:1) |
| <b>PC(34:2)</b>   | PC(16:0/18:2)                | PC(16:0/18:2), PC(16:1/18:1) |
| <b>PC(34:1)</b>   | PC(16:0/18:1)                | PC(16:0/18:1), PC(16:1/18:0) |
| <b>PC(36:4)</b>   | PC(16:0/20:4)                | PC(16:0/20:4), PC(18:2/18:2) |
| <b>PC(36:3)</b>   | PC(16:0/20:3), PC(18:1/18:2) | PC(16:0/20:3), PC(18:1/18:2) |
| <b>PC(36:2)</b>   | PC(18:0/18:2), PC(18:1/18:1) | PC(18:0/18:2), PC(18:1/18:1) |
| <b>PC(38:4)</b>   | PC(18:0/20:4)                | PC(18:0/20:4), PC(18:1/20:3) |
|                   | <b>Soleus</b>                |                              |
|                   | <b>CTL</b>                   | <b>HFHF</b>                  |
| <b>PC(34:2)</b>   | PC(16:0/18:2)                | PC(16:0/18:2)                |
| <b>PC(34:1)</b>   | PC(16:0/18:1)                | PC(16:0/18:1)                |
| <b>PC(36:4)</b>   | PC(16:0/20:4), PC(18:2/18:2) | PC(16:0/20:4), PC(18:2/18:2) |
| <b>PC(38:6)</b>   | PC(16:0/22:6), PC(18:2/20:4) | PC(16:0/22:6), PC(18:2/20:4) |



## 6. References

- 474 1. Kusminski, C., Shetty, S., Orci, L., Unger, R., and Scherer, P. (2009) Diabetes and apoptosis:  
475 lipotoxicity, *Apoptosis* 14, 1484-1495.
- 476 2. Cascio, G., Schiera, G., and Liegro, I. D. (2012) Dietary Fatty Acids in Metabolic Syndrome,  
477 Diabetes and Cardiovascular Diseases, *Current Diabetes Reviews* 8, 2-17.
- 478 3. Christie, W. W. (1985) Rapid separation and quantification of lipid classes by high performance  
479 liquid chromatography and mass (light-scattering) detection, *Journal of Lipid Research* 26, 507-  
480 512.
- 481 4. Braverman, N. E., and Moser, A. B. (2012) Functions of plasmalogen lipids in health and  
482 disease, *Biochimica et Biophysica Acta (BBA) - Molecular Basis of Disease* 1822, 1442-1452.
- 483 5. Honsho, M., and Fujiki, Y. (2017) Plasmalogen homeostasis – regulation of plasmalogen  
484 biosynthesis and its physiological consequence in mammals, *FEBS Letters* 591, 2720-2729.
- 485 6. Antonny, B., Vanni, S., Shindou, H., and Ferreira, T. (2015) From zero to six double bonds:  
486 phospholipid unsaturation and organelle function, *Trends in Cell Biology* 25, 427-436.
- 487 7. Bacle, A., and Ferreira, T. (2019) Strategies to Counter Saturated Fatty Acid (SFA)-Mediated  
488 Lipointoxication, In *The Molecular Nutrition of Fats* (Patel, V. B., Ed.), pp 347-363, Academic  
489 Press.
- 490 8. Wong, S. K., Chin, K.-Y., Suhaimi, F. H., Fairus, A., and Ima-Nirwana, S. (2016) Animal models of  
491 metabolic syndrome: a review, *Nutrition & Metabolism* 13, 65-65.
- 492 9. Lozano, I., Van der Werf, R., Bietiger, W., Seyfritz, E., Peronet, C., Pinget, M., Jeandidier, N.,  
493 Maillard, E., Marchioni, E., Sigrist, S., and Dal, S. (2016) High-fructose and high-fat diet-induced  
494 disorders in rats: impact on diabetes risk, hepatic and vascular complications, *Nutrition &*  
495 *Metabolism* 13, 15-15.
- 496 10. Kadri, L., Ferru-Clément, R., Bacle, A., Payet, L.-A., Cantereau, A., Hélye, R., Becq, F., Jayle, C.,  
497 Vandebrouck, C., and Ferreira, T. (2018) Modulation of cellular membrane properties as a  
498 potential therapeutic strategy to counter lipointoxication in obstructive pulmonary diseases,  
499 *Biochimica et Biophysica Acta (BBA) - Molecular Basis of Disease* 1864, 3069-3084.
- 500 11. Husen, P., Tarasov, K., Katafiasz, M., Sokol, E., Vogt, J., Baumgart, J., Nitsch, R., Ekroos, K., and  
501 Ejsing, C. S. (2013) Analysis of Lipid Experiments (ALEX): A Software Framework for Analysis of  
502 High-Resolution Shotgun Lipidomics Data, *PLoS ONE* 8, e79736.
- 503 12. Carneiro-Júnior, M. A., Quintão-Júnior, J. F., Drummond, L. R., Lavorato, V. N., Drummond, F.  
504 R., da Cunha, D. N. Q., Amadeu, M. A., Felix, L. B., de Oliveira, E. M., Cruz, J. S., Prímola-Gomes,  
505 T. N., Mill, J. G., and Natali, A. J. (2013) The benefits of endurance training in cardiomyocyte  
506 function in hypertensive rats are reversed within four weeks of detraining, *Journal of*  
507 *Molecular and Cellular Cardiology* 57, 119-128.
- 508 13. Fortner, C. N., Lorenz, J. N., and Paul, R. J. (2001) Chloride channel function is linked to  
509 epithelium-dependent airway relaxation, *Am J Physiol Lung Cell Mol Physiol* 280, 334-341.
- 510 14. Vandebrouck, C., Melin, P., Norez, C., Robert, R., Guibert, C., Mettey, Y., and Becq, F. (2006)  
511 Evidence that CFTR is expressed in rat tracheal smooth muscle cells and contributes to  
512 bronchodilation, *Respiratory Research* 7, 113.
- 513 15. Watson, N., Magnussen, H., and Rabe, K. F. (1998) The relevance of resting tension to  
514 responsiveness and inherent tone of human bronchial smooth muscle, *British Journal of*  
515 *Pharmacology* 123, 694-700.

- 516 16. Bell, R. M., Mocanu, M. M., and Yellon, D. M. (2011) Retrograde heart perfusion: The  
517 Langendorff technique of isolated heart perfusion, *Journal of Molecular and Cellular*  
518 *Cardiology* 50, 940-950.
- 519 17. Hicks, A. M., DeLong, C. J., Thomas, M. J., Samuel, M., and Cui, Z. (2006) Unique molecular  
520 signatures of glycerophospholipid species in different rat tissues analyzed by tandem mass  
521 spectrometry, *Biochimica et Biophysica Acta (BBA) - Molecular and Cell Biology of Lipids* 1761,  
522 1022-1029.
- 523 18. Nguyen, P., Leray, V., Diez, M., Serisier, S., Bloc'h, J. L., Siliart, B., and Dumon, H. (2008) Liver  
524 lipid metabolism, *Journal of Animal Physiology and Animal Nutrition* 92, 272-283.
- 525 19. Kleiner, D. E., Brunt, E. M., Van Natta, M., Behling, C., Contos, M. J., Cummings, O. W., Ferrell,  
526 L. D., Liu, Y.-C., Torbenson, M. S., Unalp-Arida, A., Yeh, M., McCullough, A. J., and Sanyal, A. J.  
527 (2005) Design and validation of a histological scoring system for nonalcoholic fatty liver  
528 disease, *Hepatology* 41, 1313-1321.
- 529 20. Tallis, J., James, R. S., and Seebacher, F. (2018) The effects of obesity on skeletal muscle  
530 contractile function, *The Journal of Experimental Biology* 221.
- 531 21. Sayer, A. A., Dennison, E. M., Syddall, H. E., Gilbody, H. J., Phillips, D. I. W., and Cooper, C.  
532 (2005) Type 2 Diabetes, Muscle Strength, and Impaired Physical Function, *The tip of the*  
533 *iceberg?* 28, 2541-2542.
- 534 22. Ortega Francisco, B., Lavie Carl, J., and Blair Steven, N. (2016) Obesity and Cardiovascular  
535 Disease, *Circulation Research* 118, 1752-1770.
- 536 23. Robinson, M. R., Scheuermann-Freestone, M., Leeson, P., Channon, K. M., Clarke, K.,  
537 Neubauer, S., and Wiesmann, F. (2008) Uncomplicated obesity is associated with abnormal  
538 aortic function assessed by cardiovascular magnetic resonance, *Journal of cardiovascular*  
539 *magnetic resonance : official journal of the Society for Cardiovascular Magnetic Resonance* 10,  
540 10-10.
- 541 24. Gimenez, M. S., Oliveros, L. B., and Gomez, N. N. (2011) Nutritional deficiencies and  
542 phospholipid metabolism, *International journal of molecular sciences* 12, 2408-2433.
- 543 25. Klop, B., Elte, J. W. F., and Cabezas, M. C. (2013) Dyslipidemia in obesity: mechanisms and  
544 potential targets, *Nutrients* 5, 1218-1240.
- 545 26. Kumashiro, N., Erion, D. M., Zhang, D., Kahn, M., Beddow, S. A., Chu, X., Still, C. D., Gerhard, G.  
546 S., Han, X., Dziura, J., Petersen, K. F., Samuel, V. T., and Shulman, G. I. (2011) Cellular  
547 mechanism of insulin resistance in nonalcoholic fatty liver disease, *Proceedings of the National*  
548 *Academy of Sciences* 108, 16381-16385.
- 549 27. Pinot, M., Vanni, S., Pagnotta, S., Lacas-Gervais, S., Payet, L.-A., Ferreira, T., Gautier, R., Goud,  
550 B., Antony, B., and Barelli, H. (2014) Polyunsaturated phospholipids facilitate membrane  
551 deformation and fission by endocytic proteins, *Science* 345, 693-697.
- 552 28. Nakajima, T., Fujioka, S., Tokunaga, K., Hirobe, K., Matsuzawa, Y., and Tarui, S. (1985)  
553 Noninvasive study of left ventricular performance in obese patients: influence of duration of  
554 obesity, *Circulation* 71, 481-486.
- 555

Figure 1

A

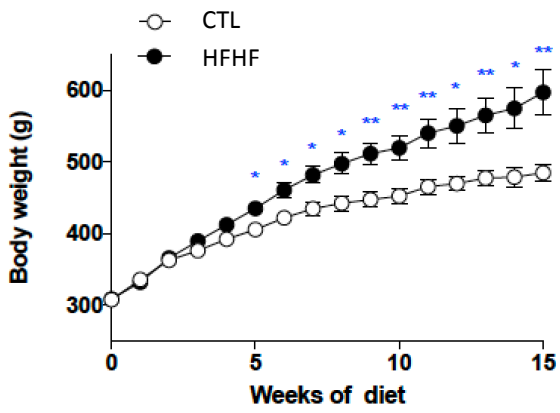

B

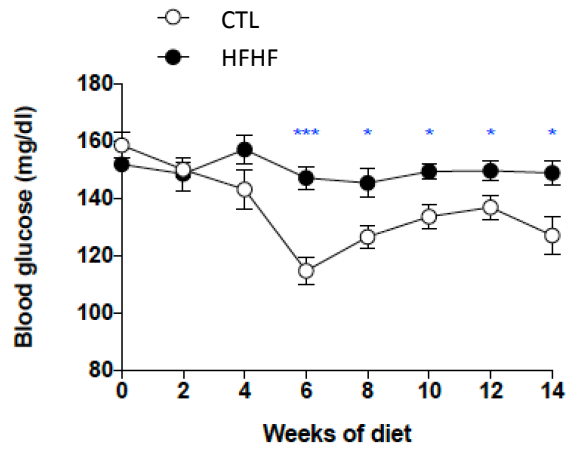

C

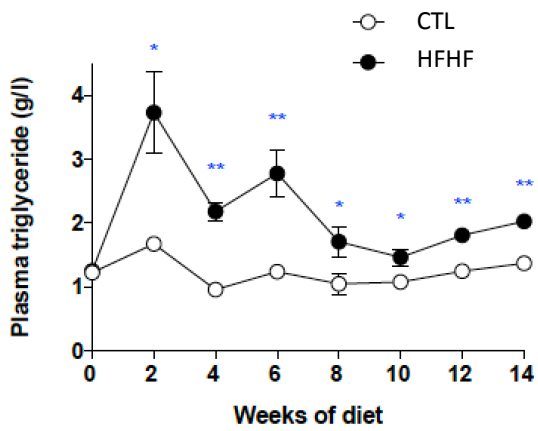

D

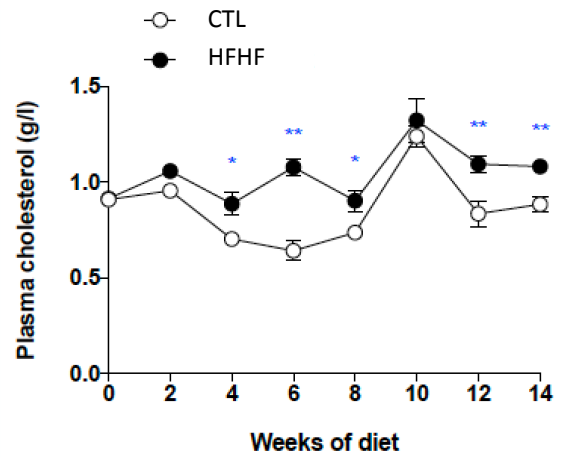

# Figure 2

## Brain

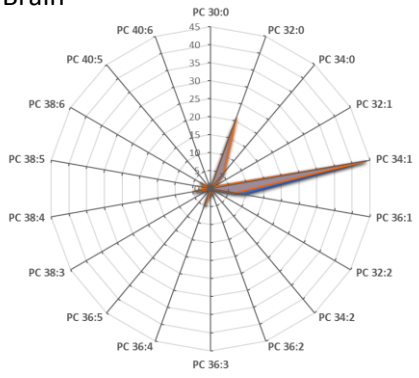

## Lung

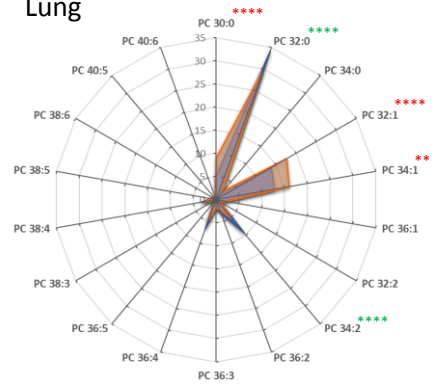

## Right Ventricle

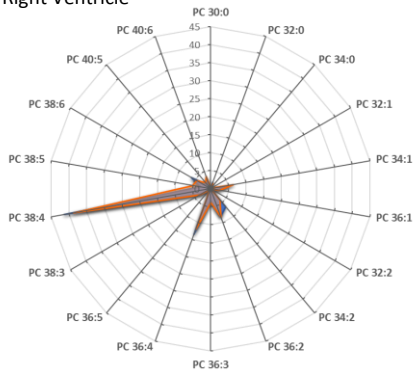

## Right Atrium

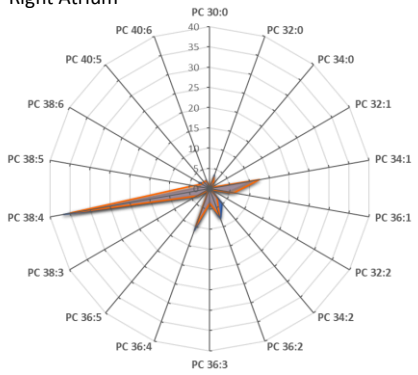

## Cardiovascular

### Aorta

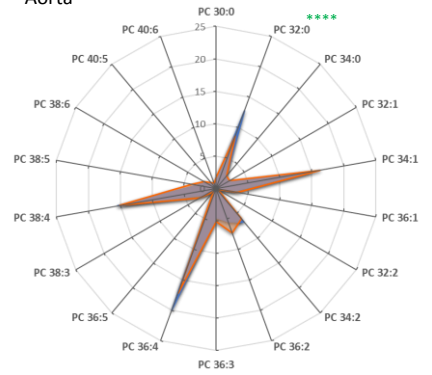

## Liver

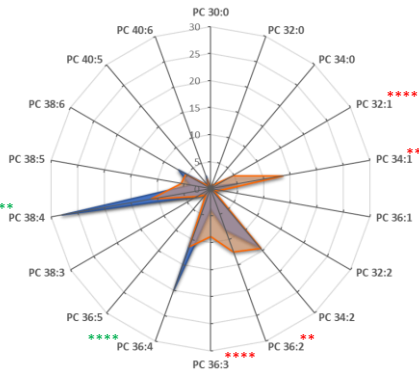

## Spleen

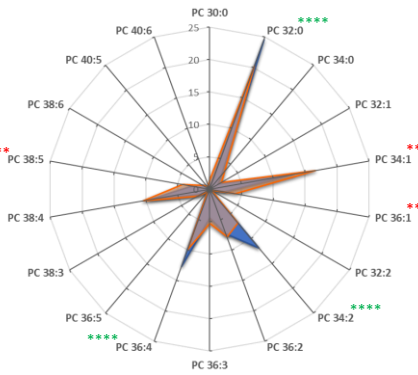

## Digestive

### Pancreas

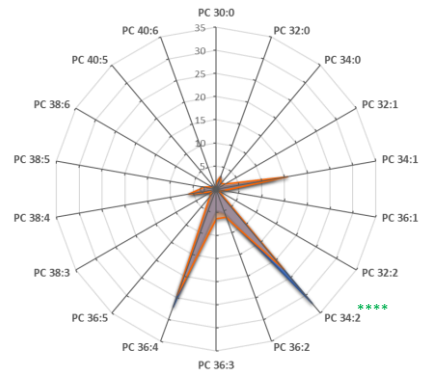

## Soleus

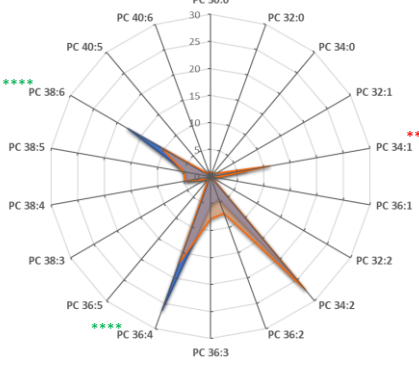

## EDL

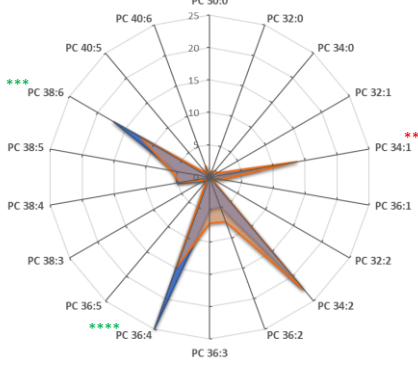

## Muscles

CTL

HFHF

Figure 3

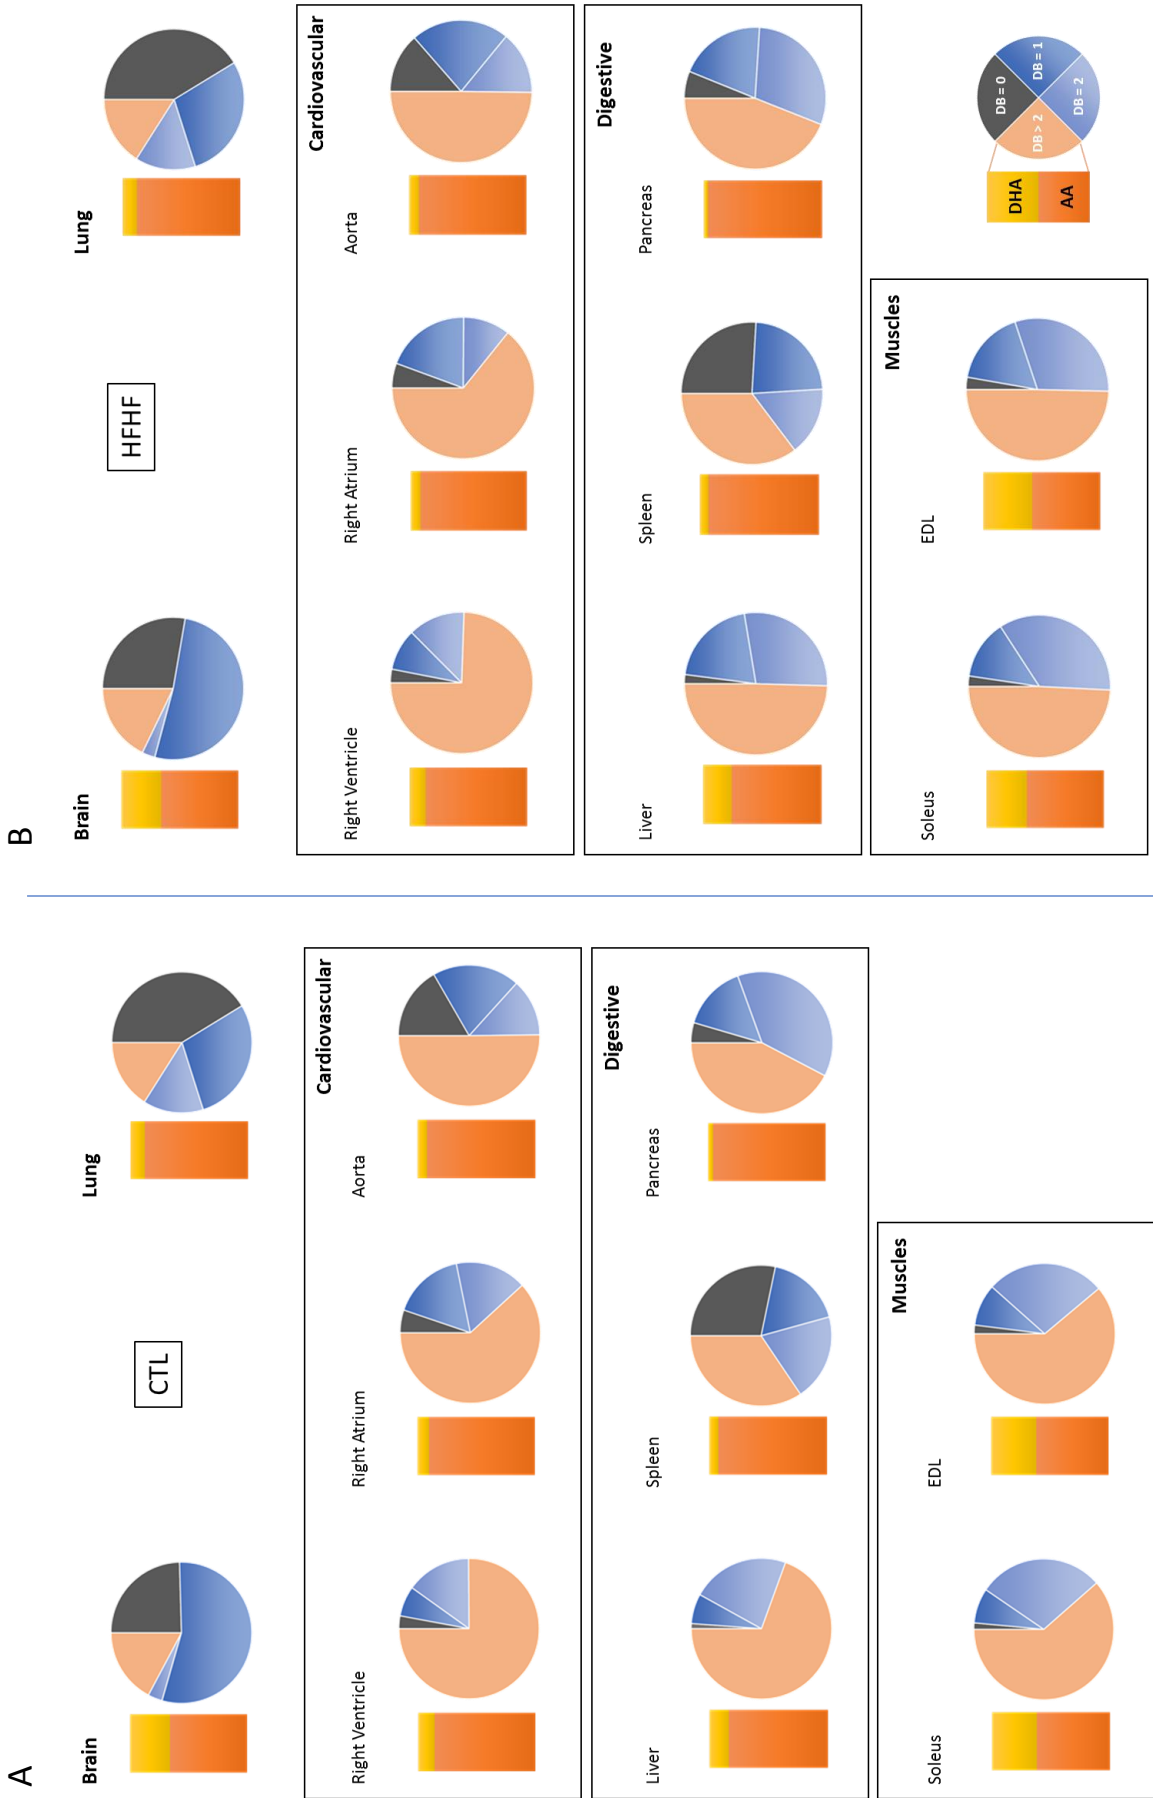

Figure 4

A

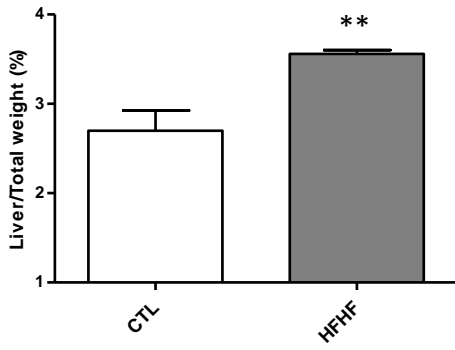

B

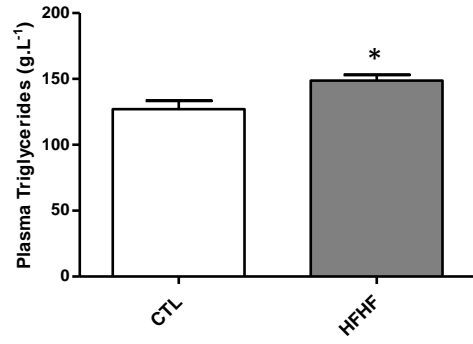

C

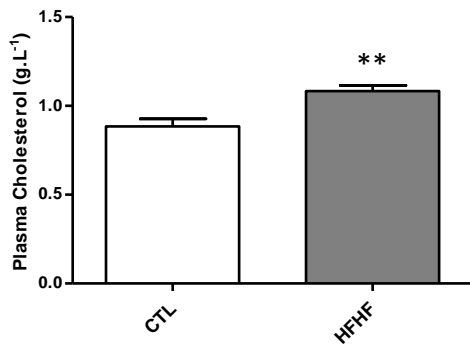

D

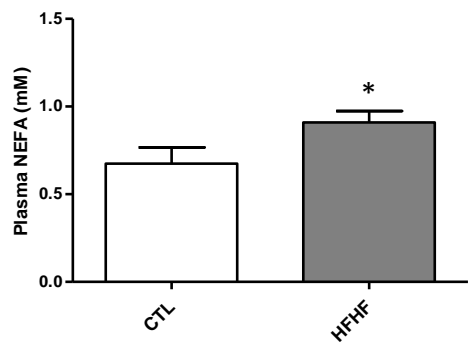

E

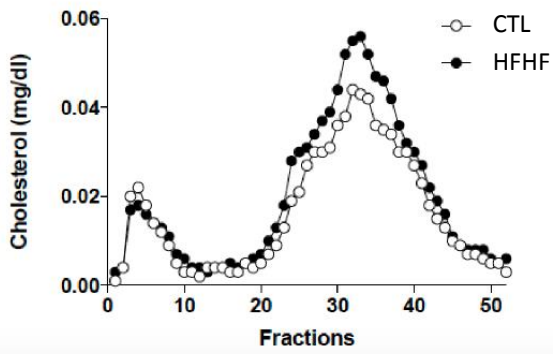

F

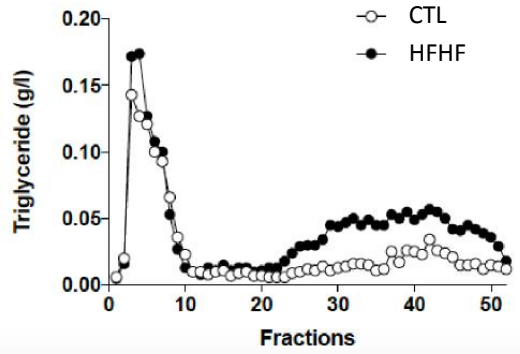

Figure 5

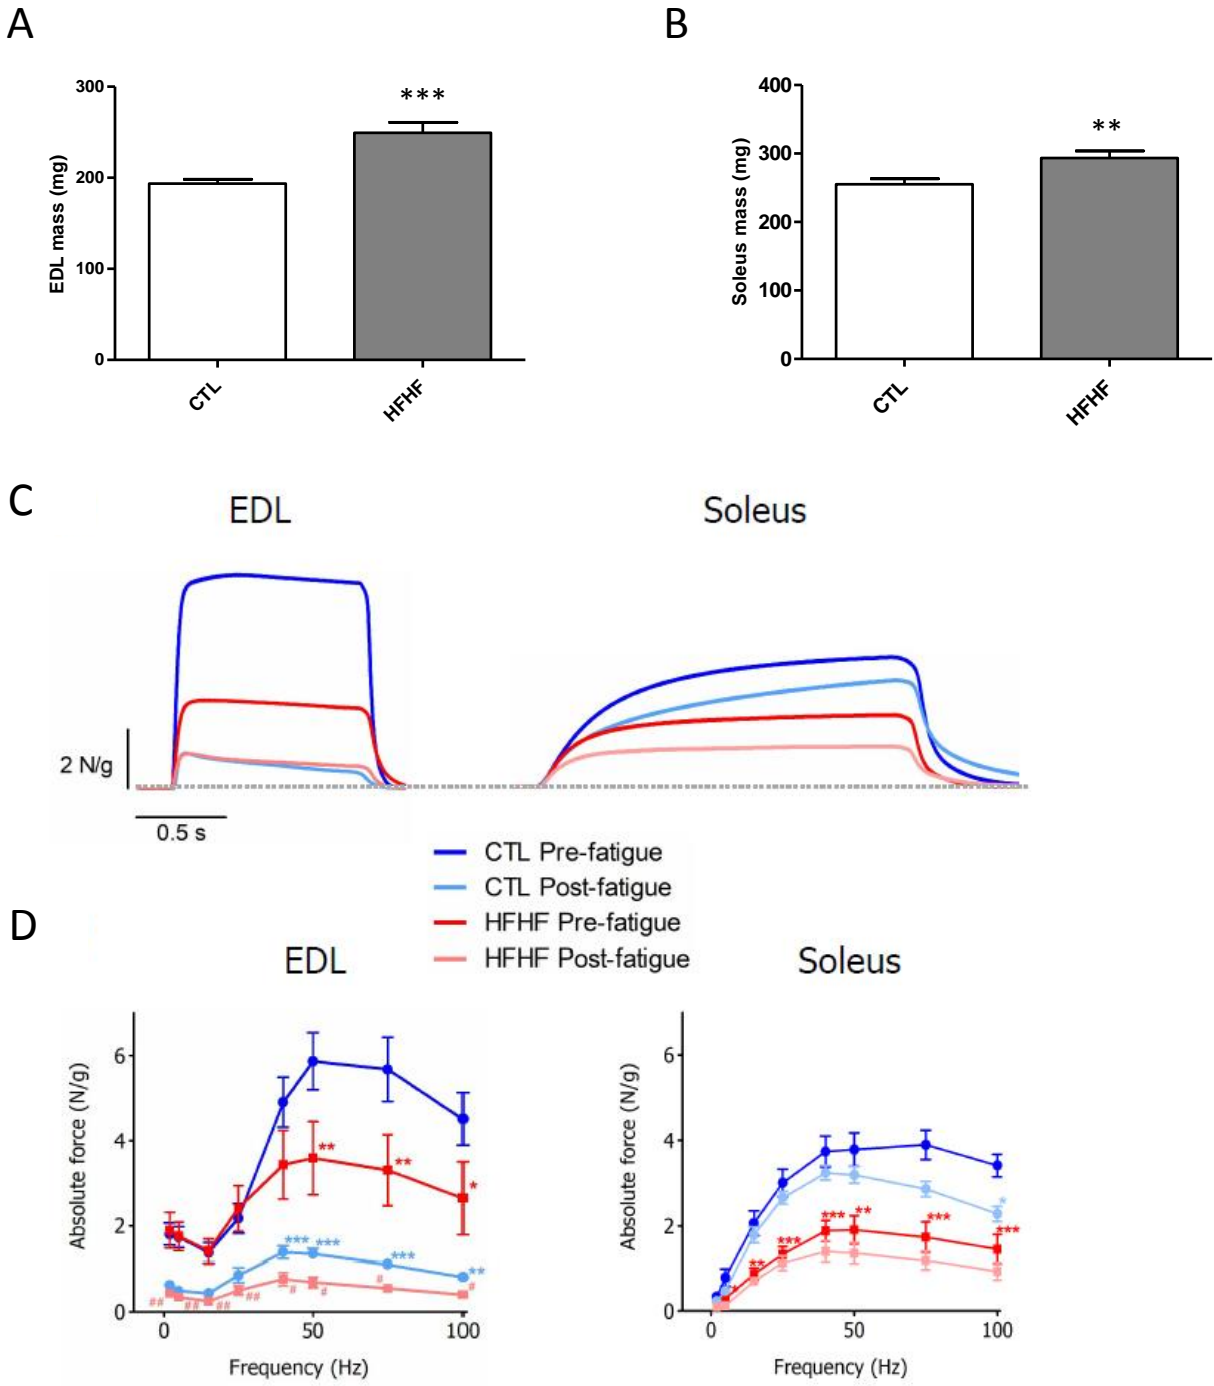

Figure 6

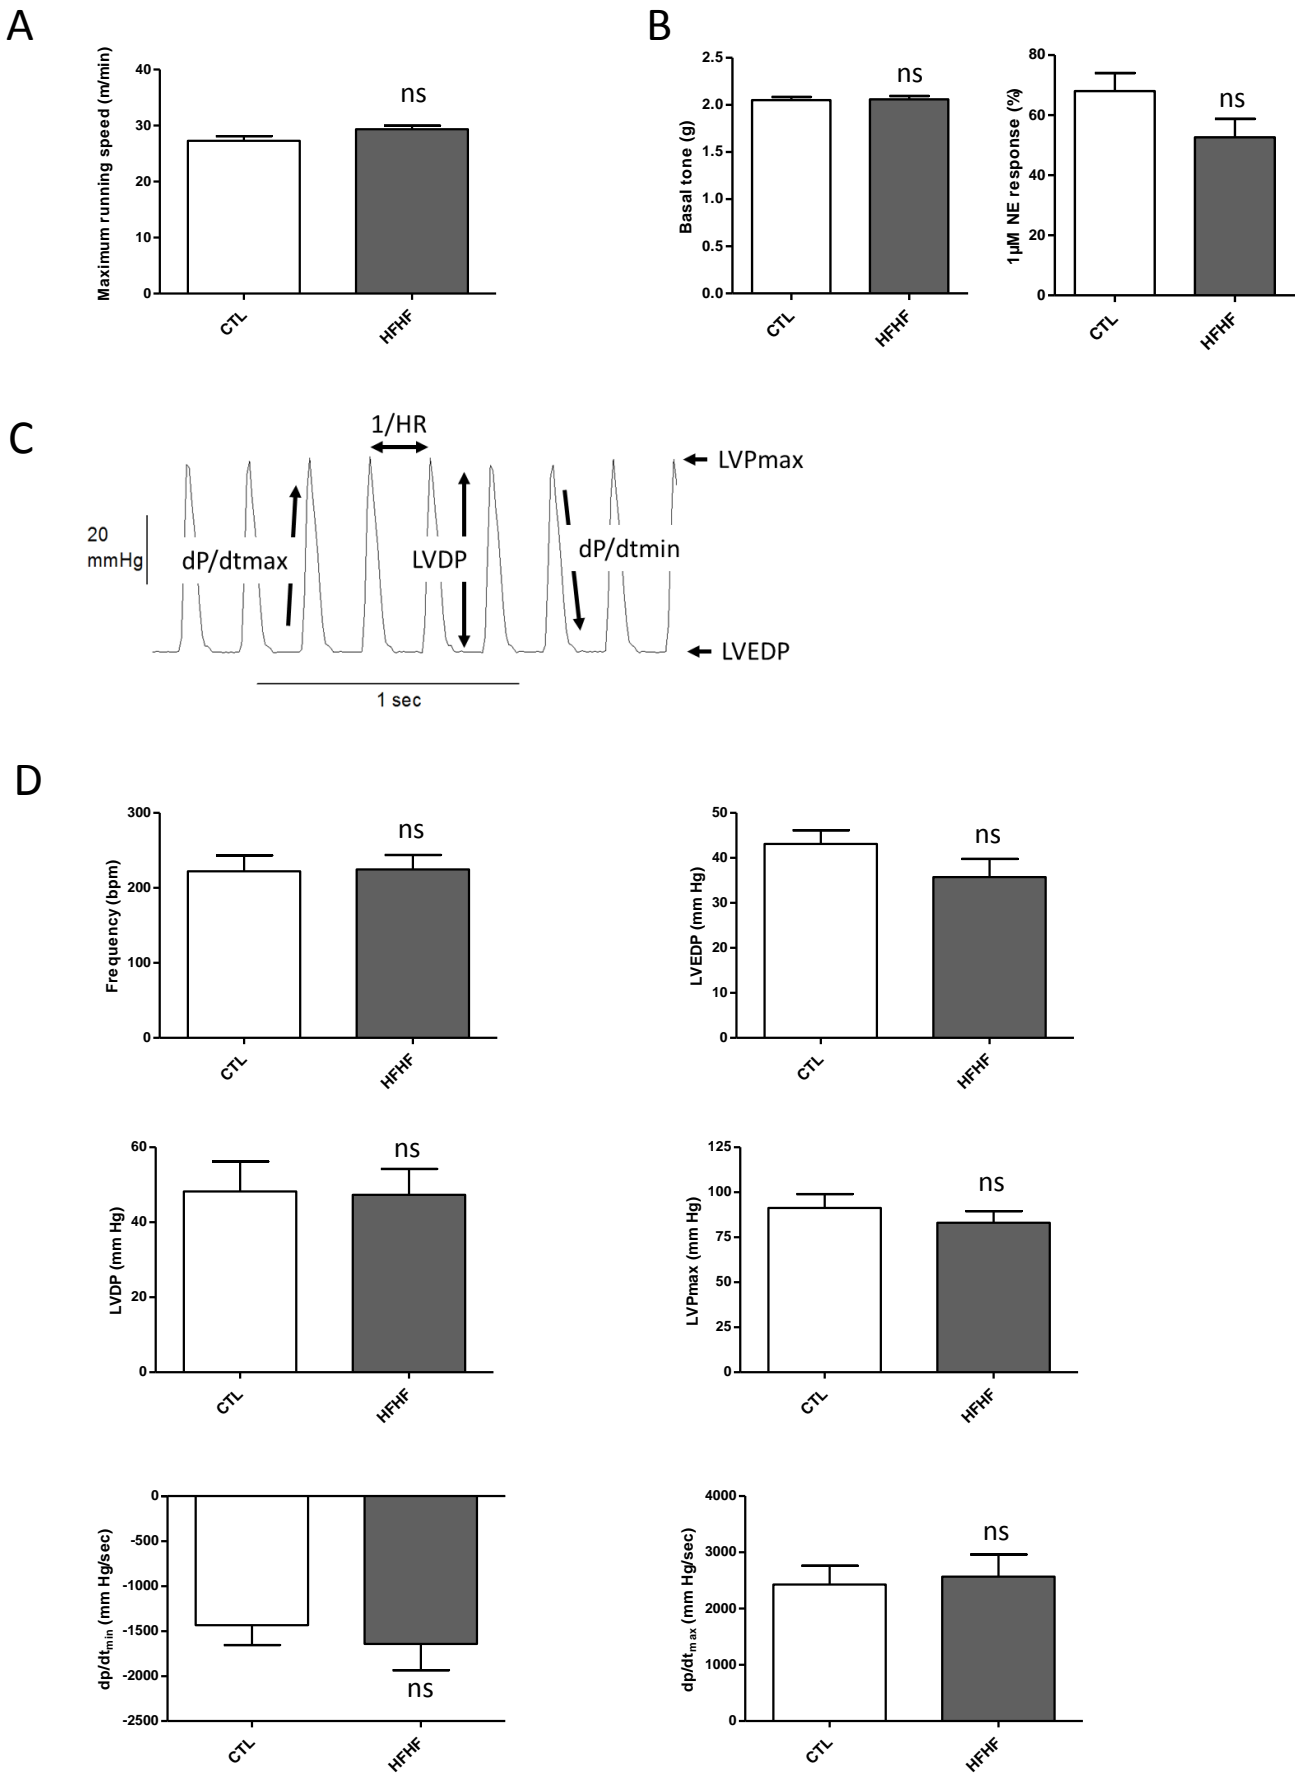

Source: https://www.biorxiv.org/content/10.1101/2019.12.13.875096v1.full.pdf
