# Supplementary material for: A comprehensive study of Phospholipid fatty acid rearrangements in the early onset of the metabolic syndrome: correlations to organ dysfunction
Source: bioRxiv or medRxiv preprint supplement (doi:10.1101/2019.12.13.875096), 2019-12-13

# Supplementary Fig. 1

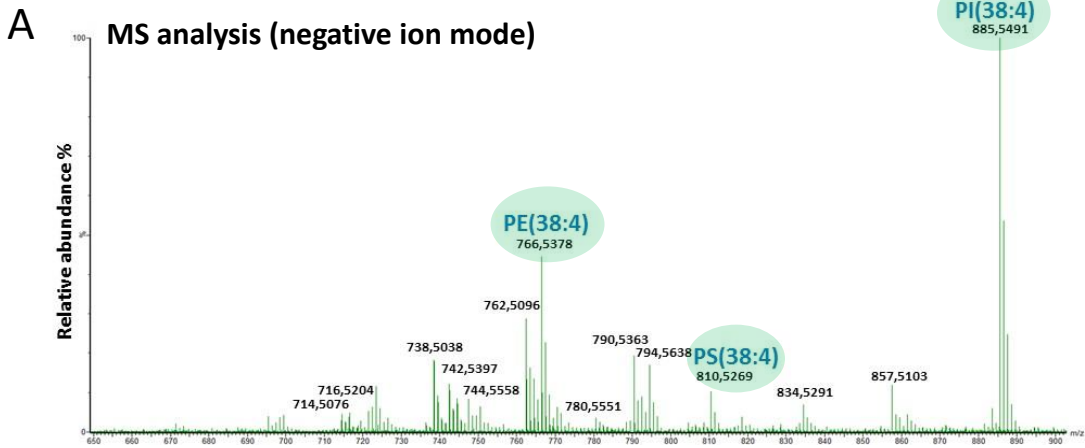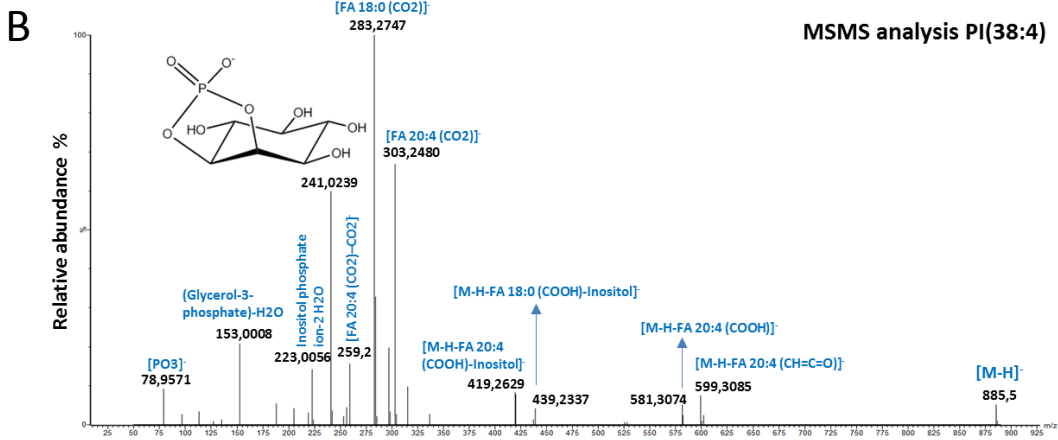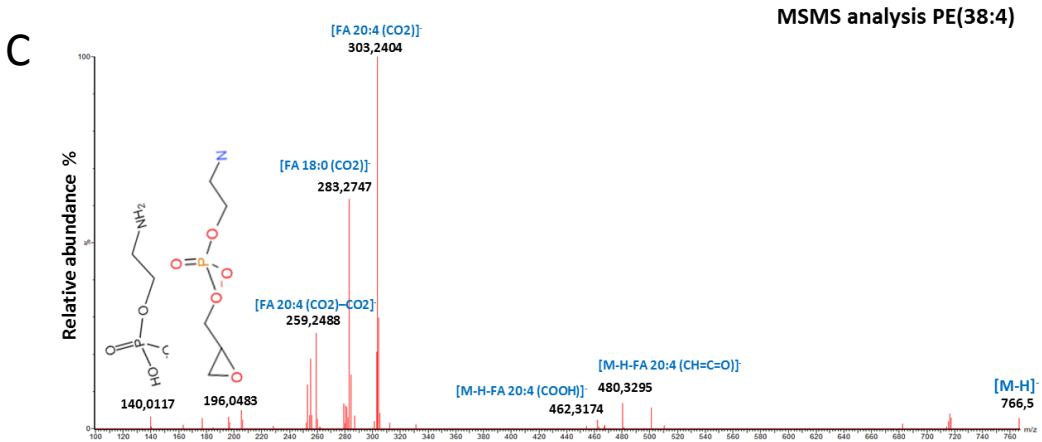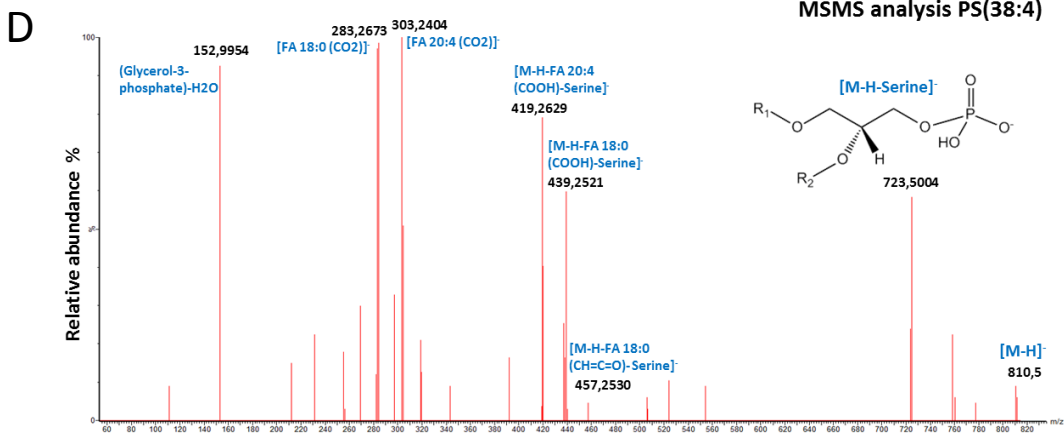

# Supplementary Fig. 2

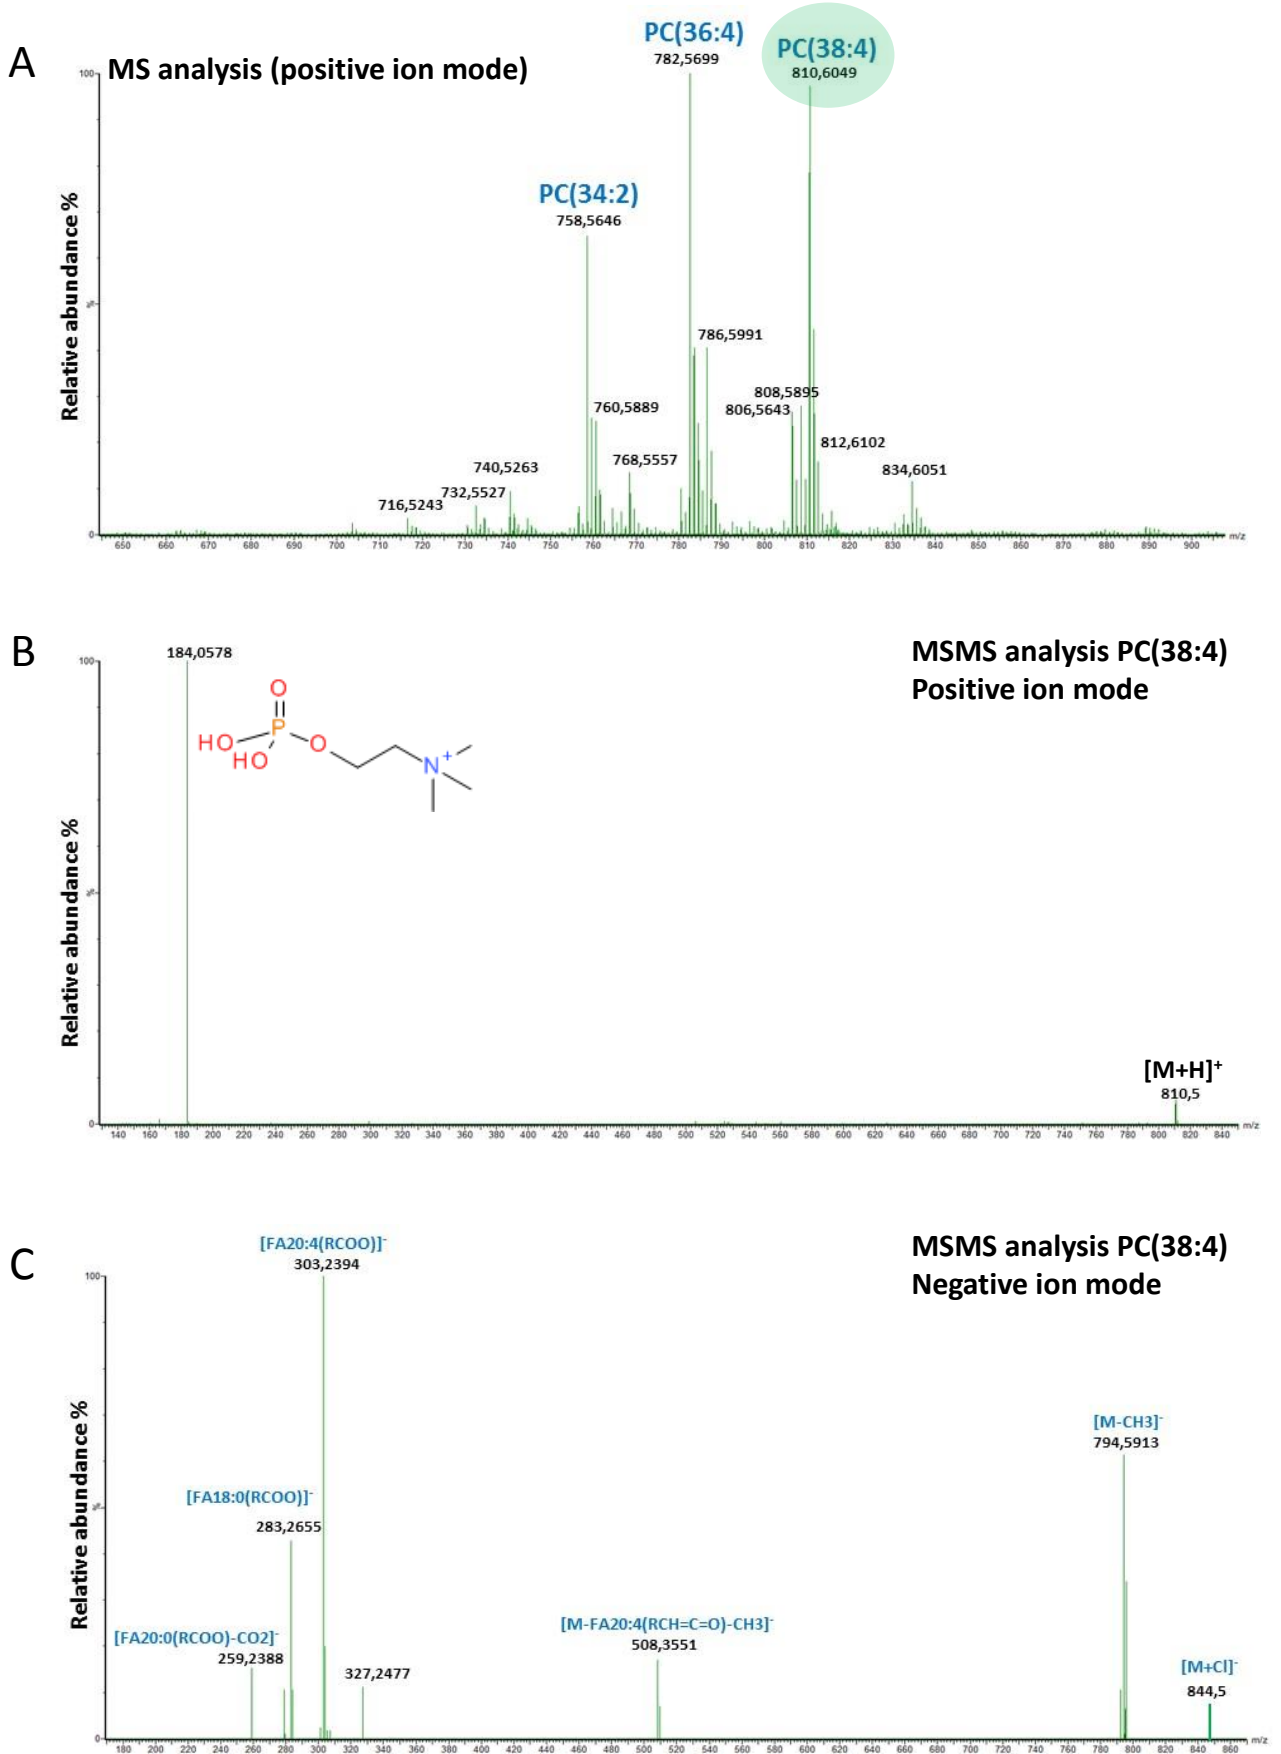

# Supplementary Fig. 3

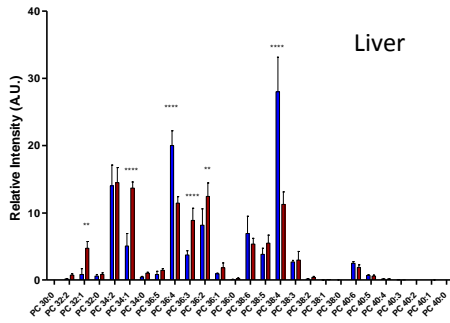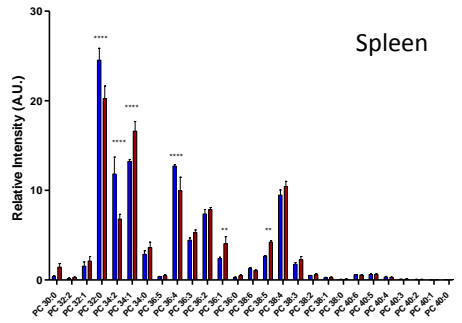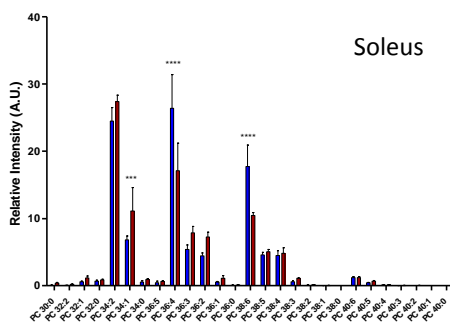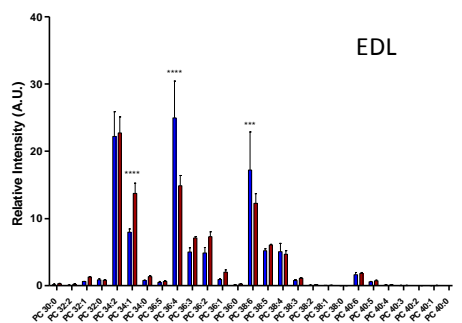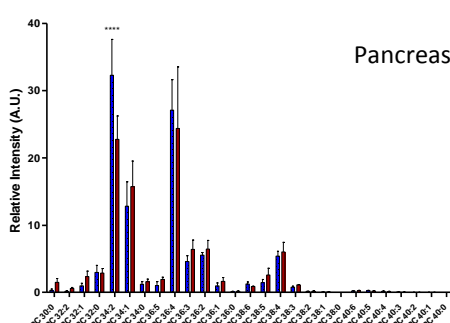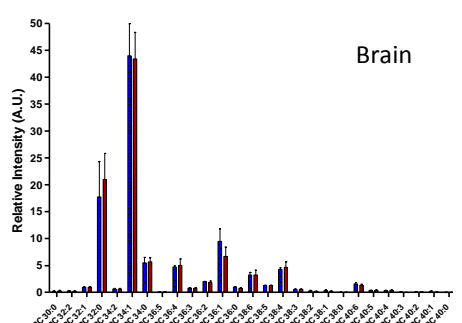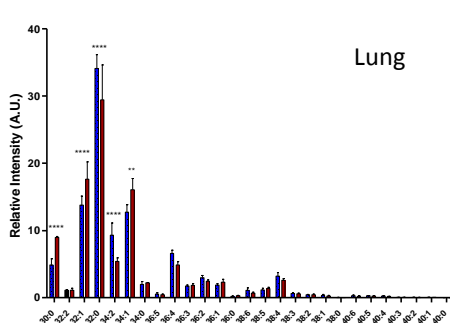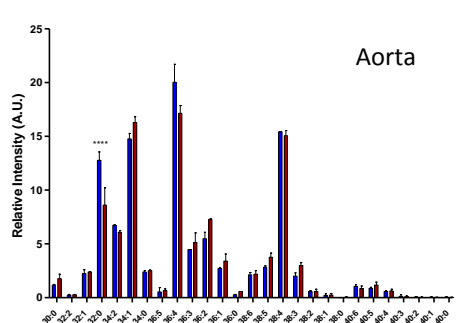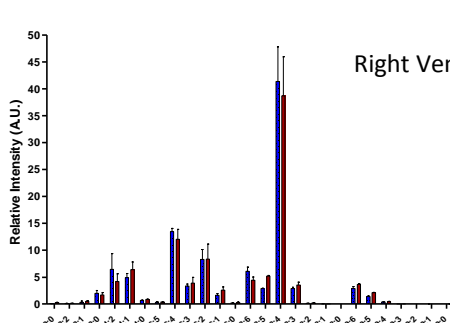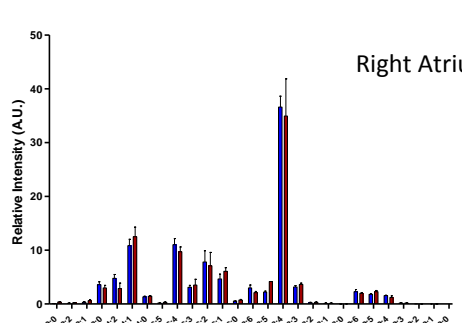

# Supplementary Fig. 4

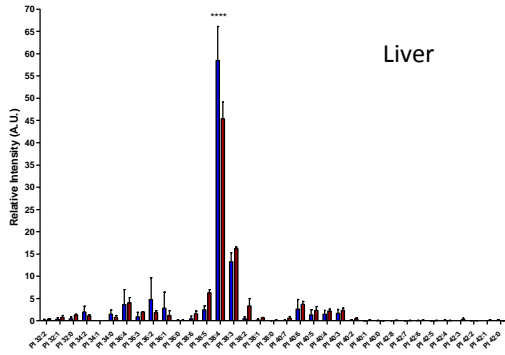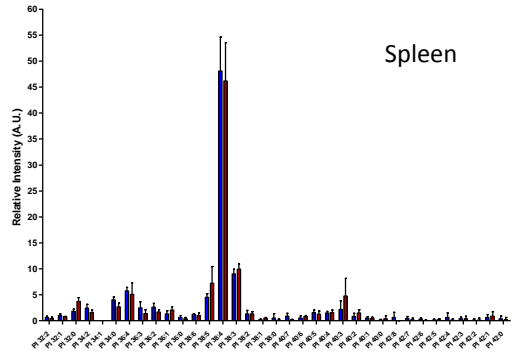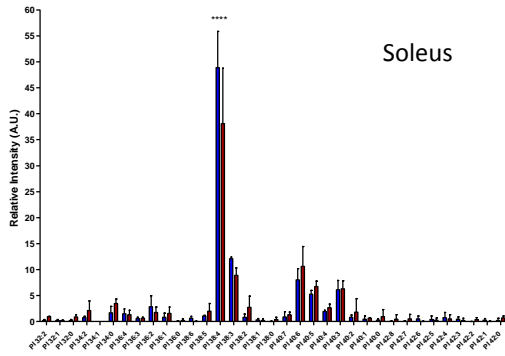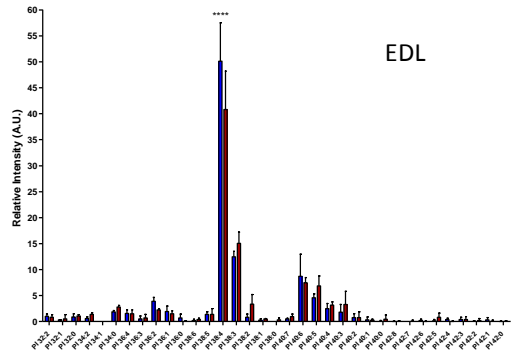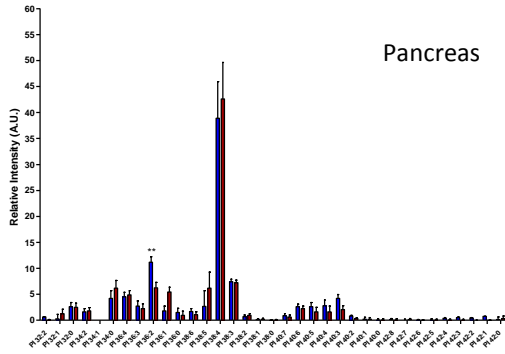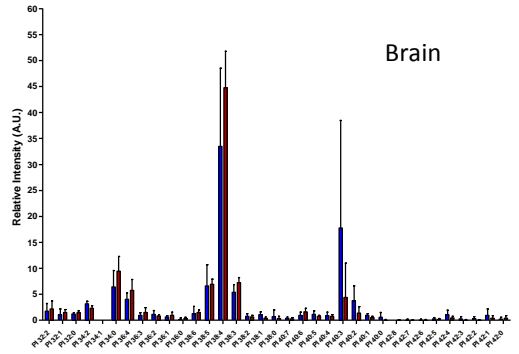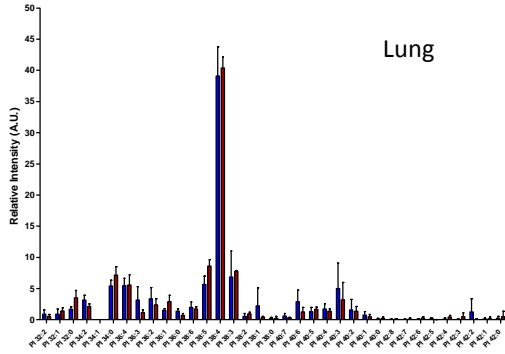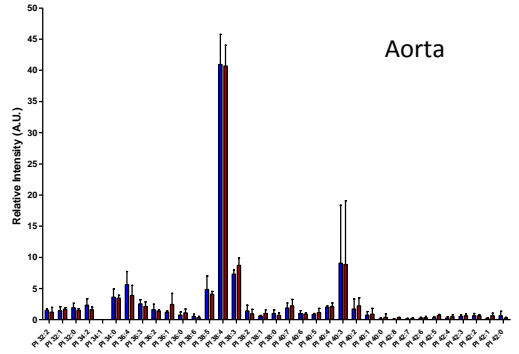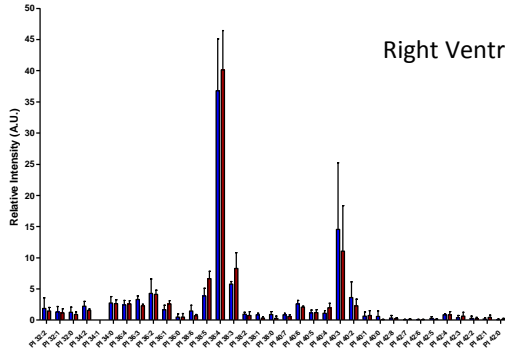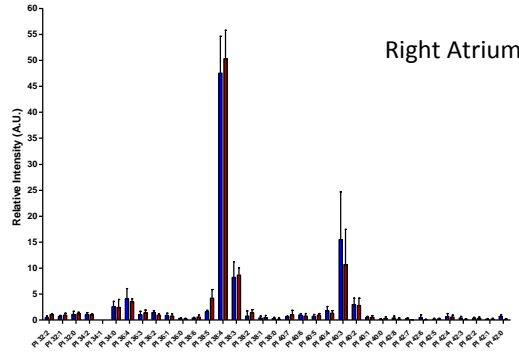



# Supplementary Fig. 6

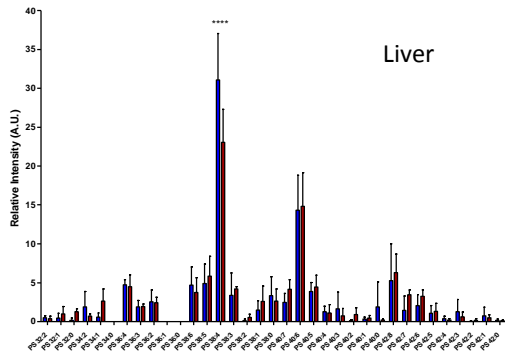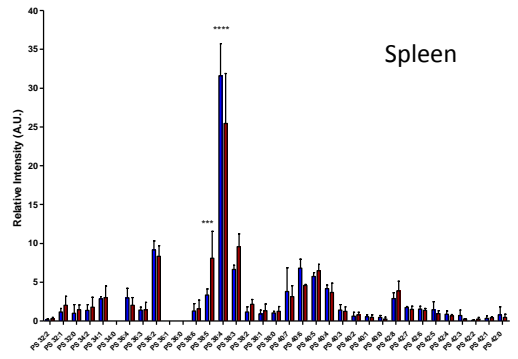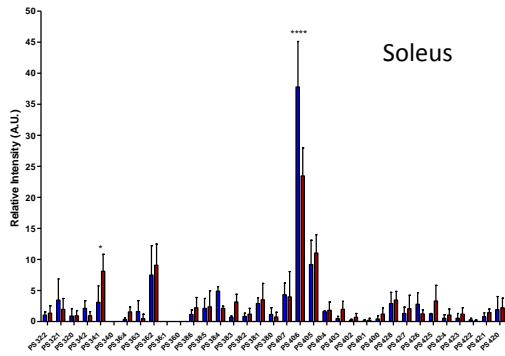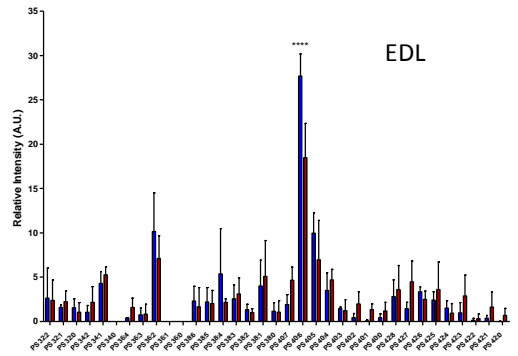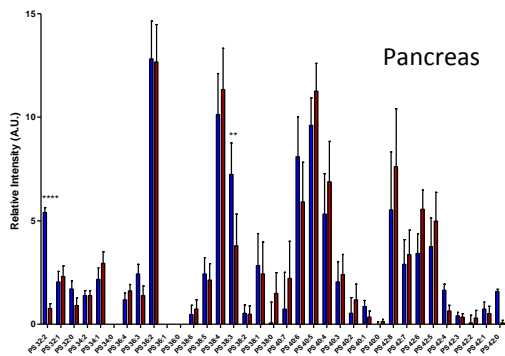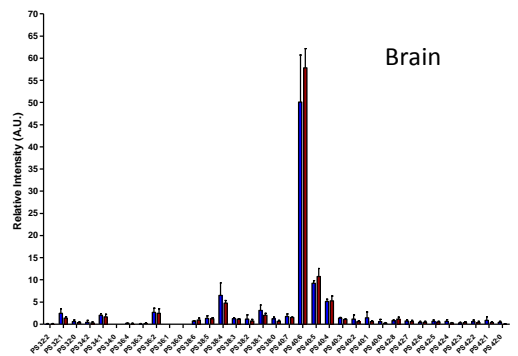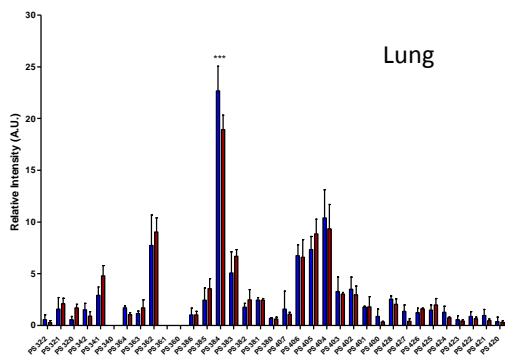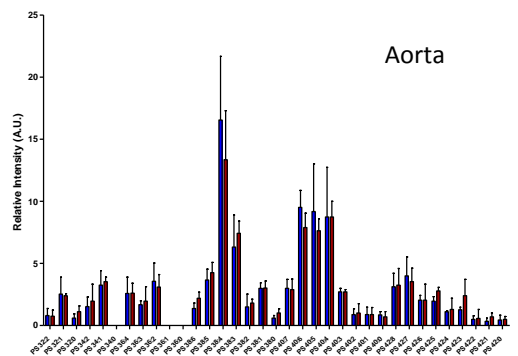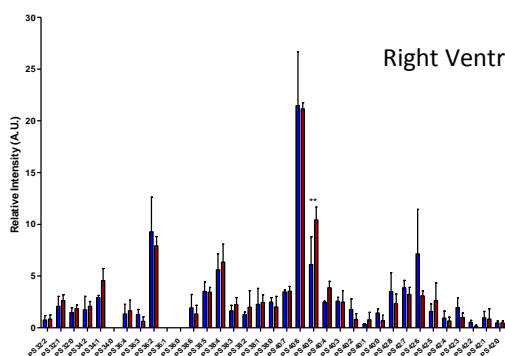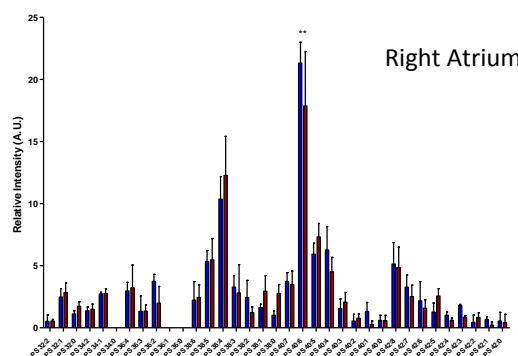

# Supplementary Fig. 7

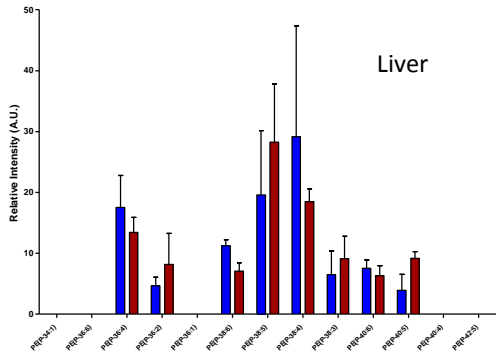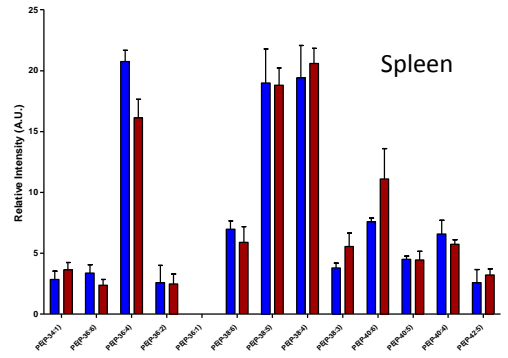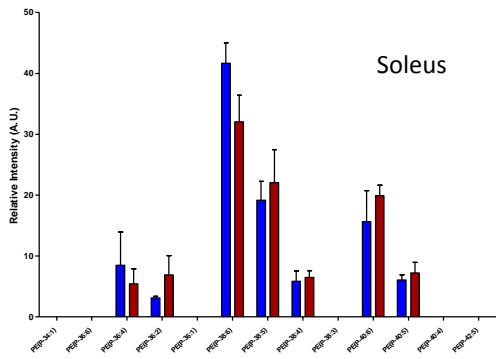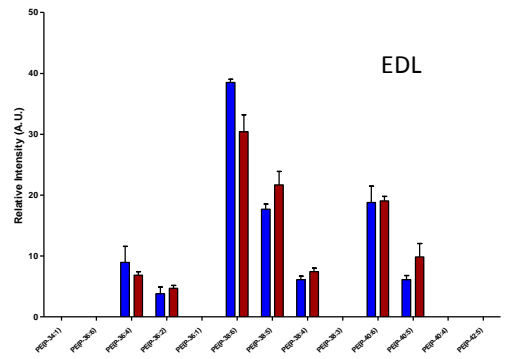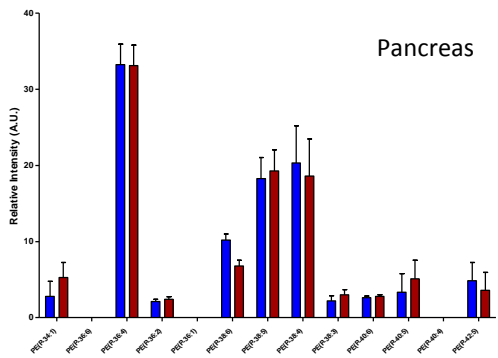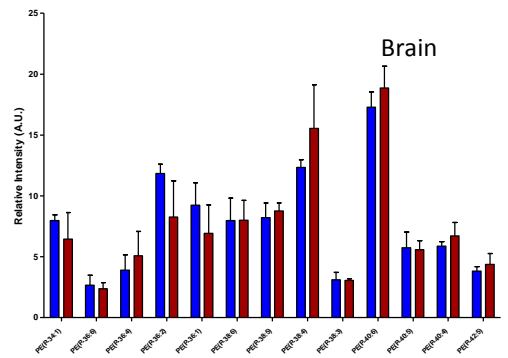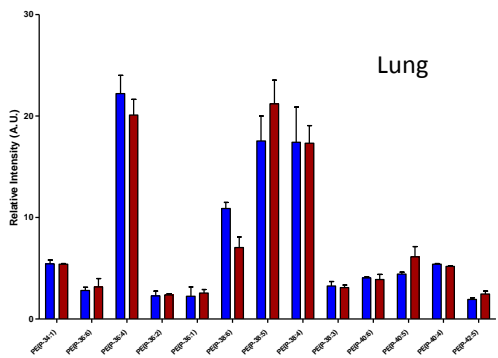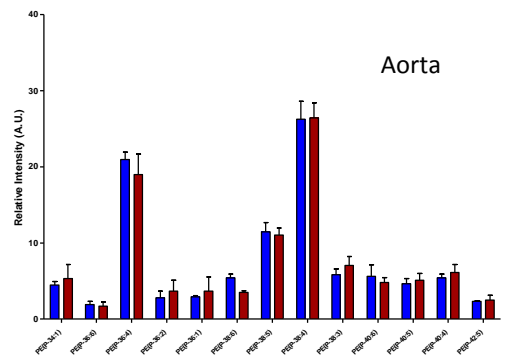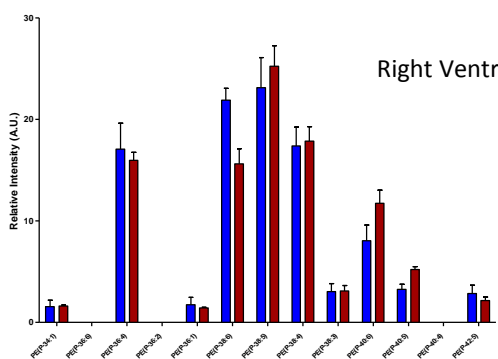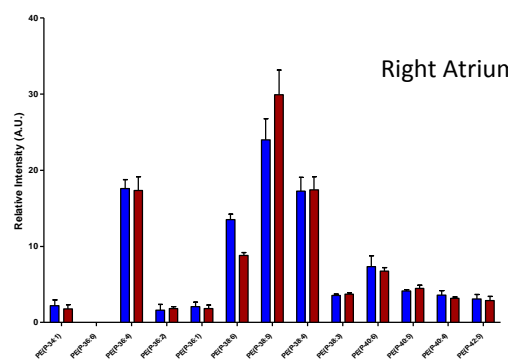

# Supplementary Fig. 8

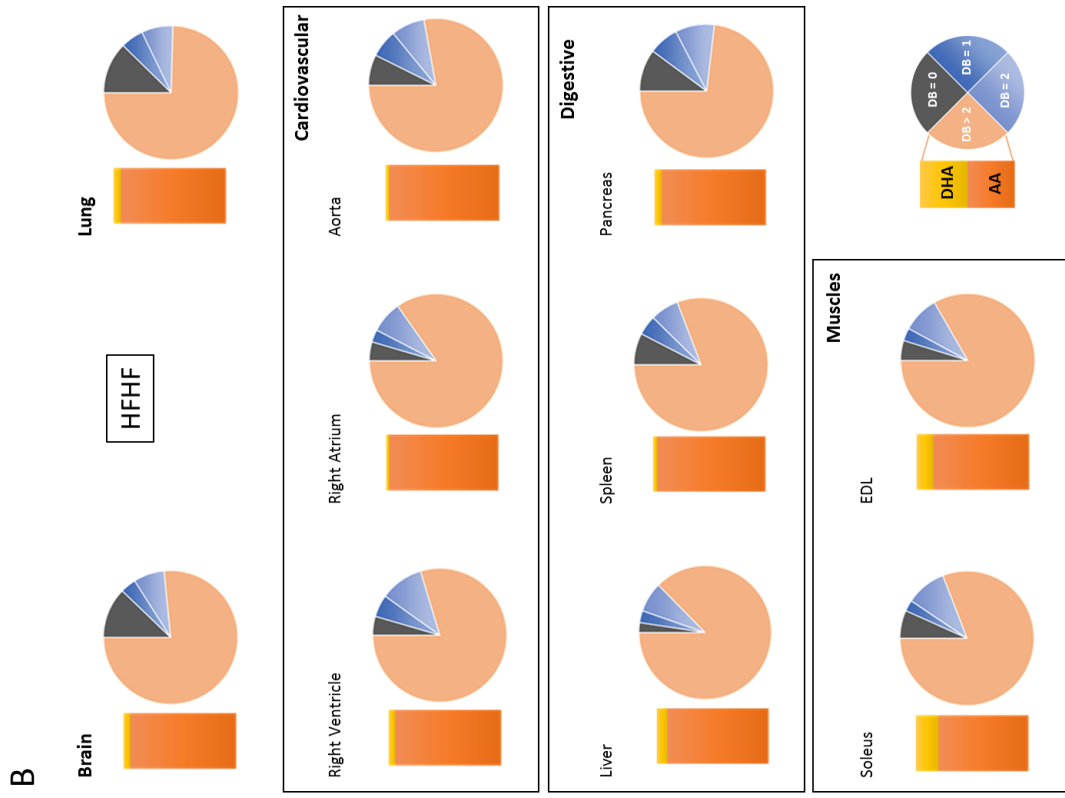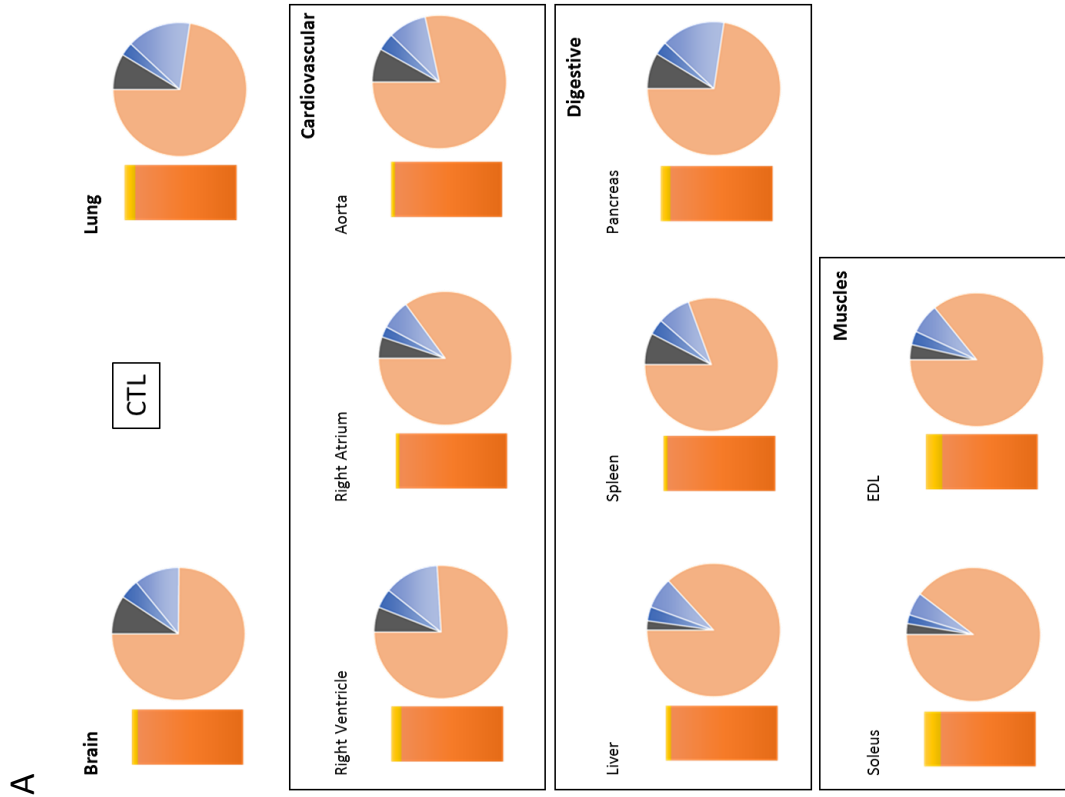



# Supplementary Fig. 9

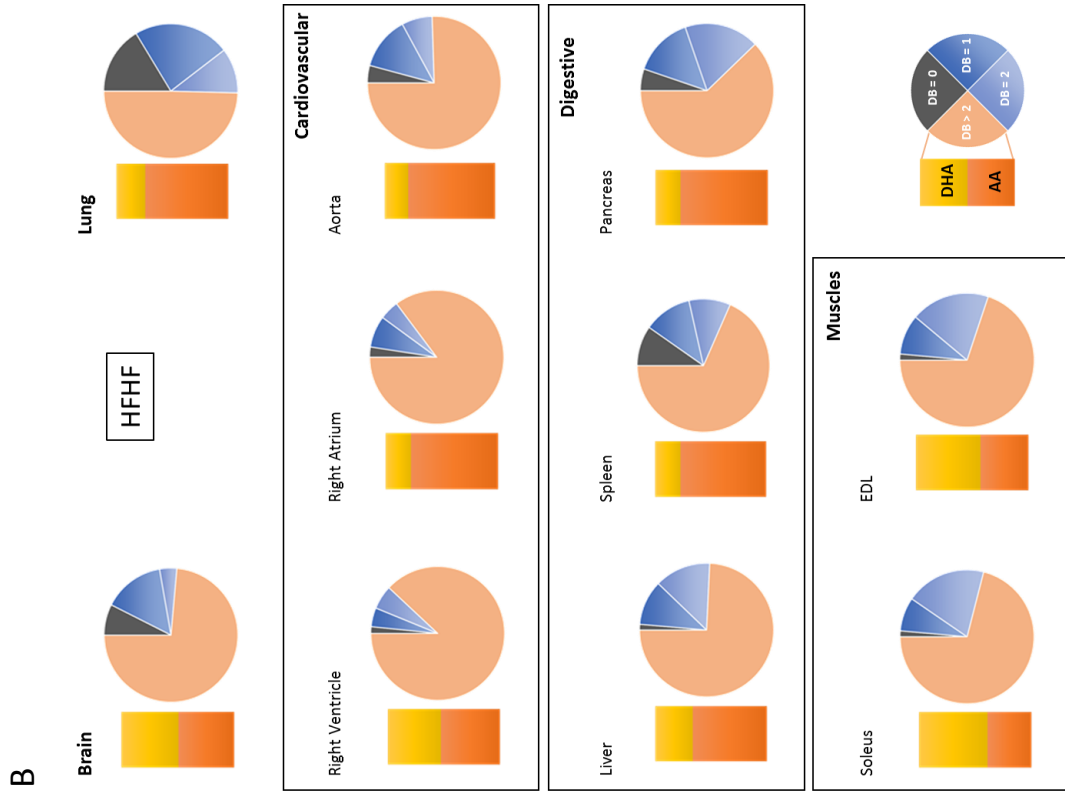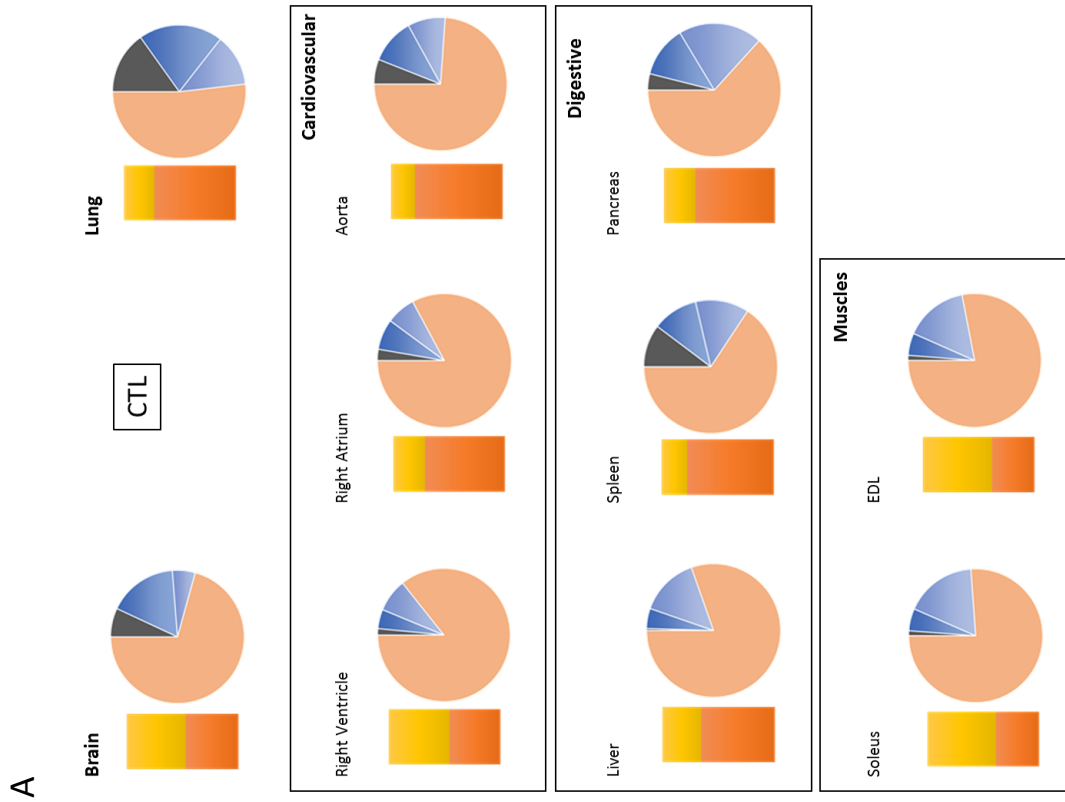

# Supplementary Fig. 10

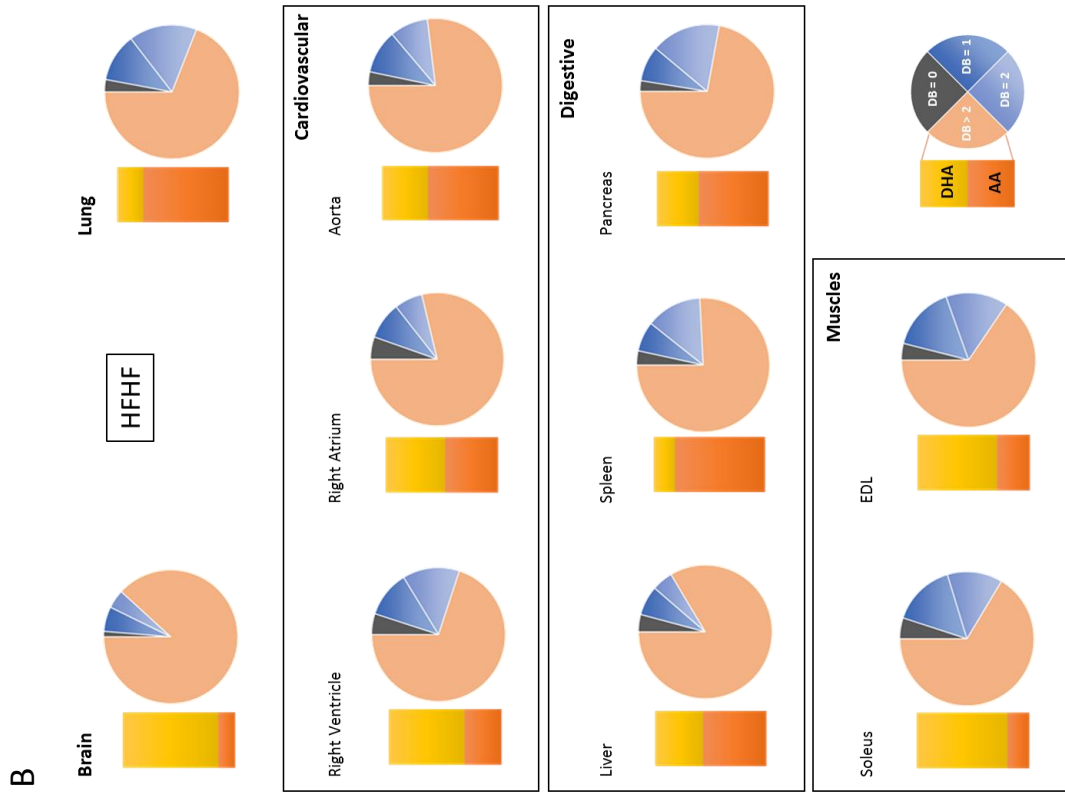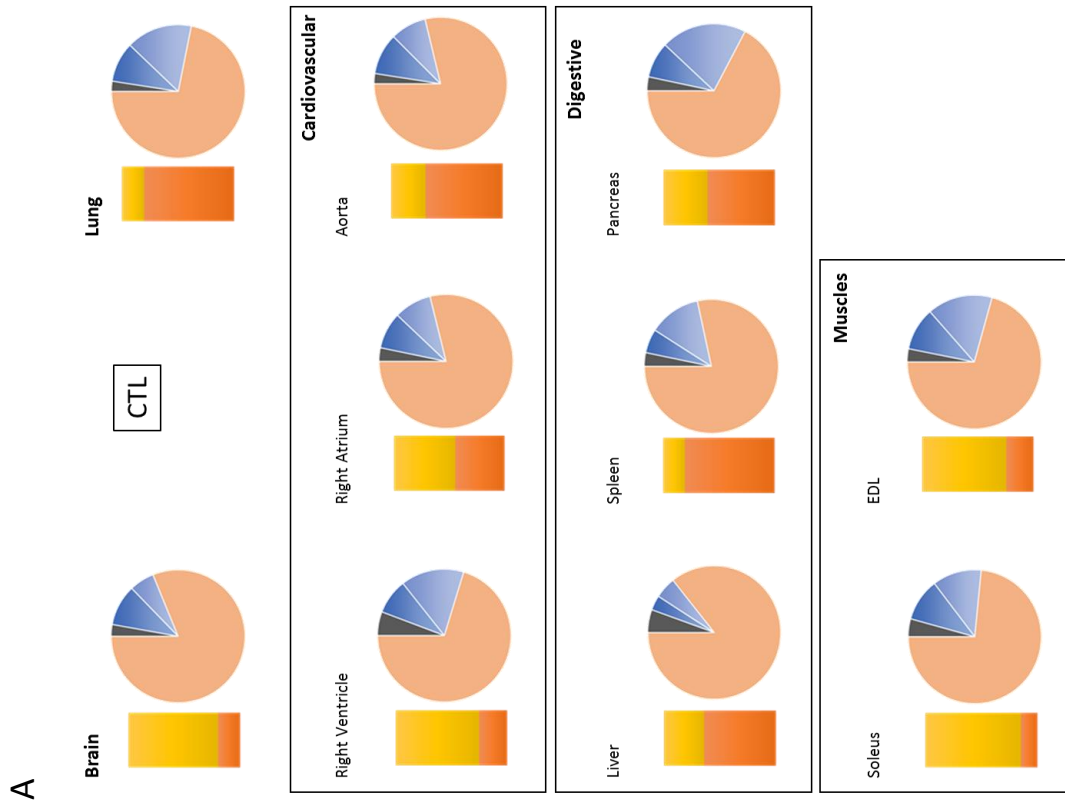

# Supplementary Fig. 11

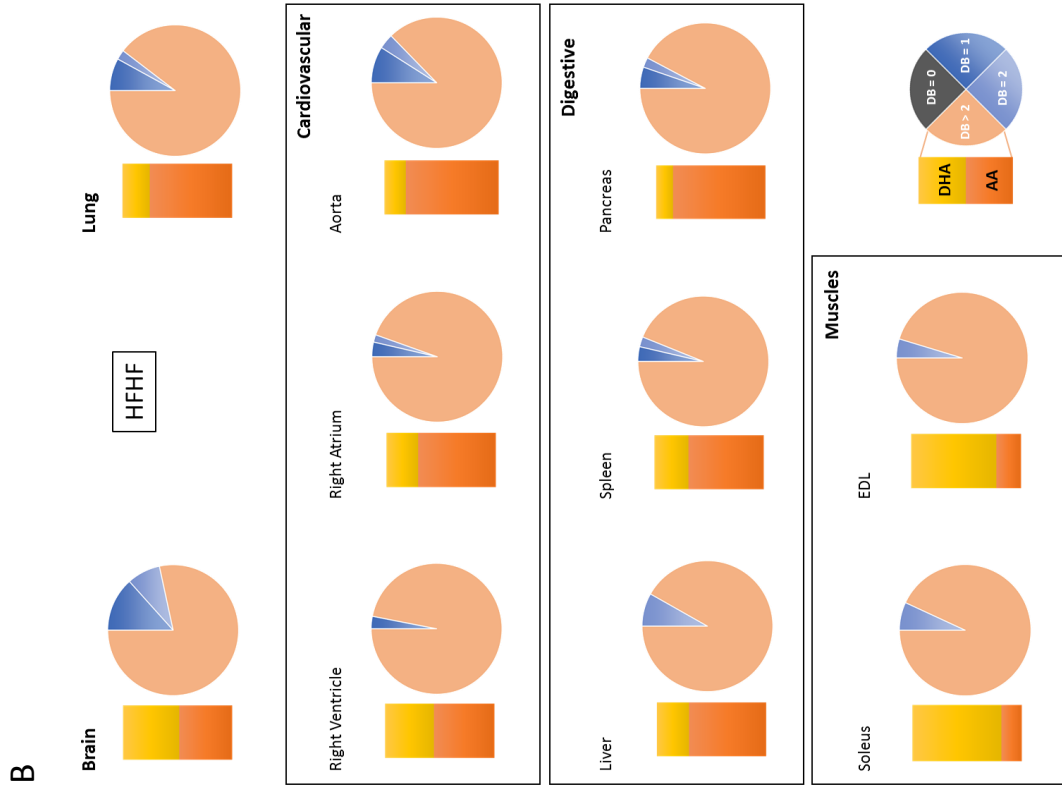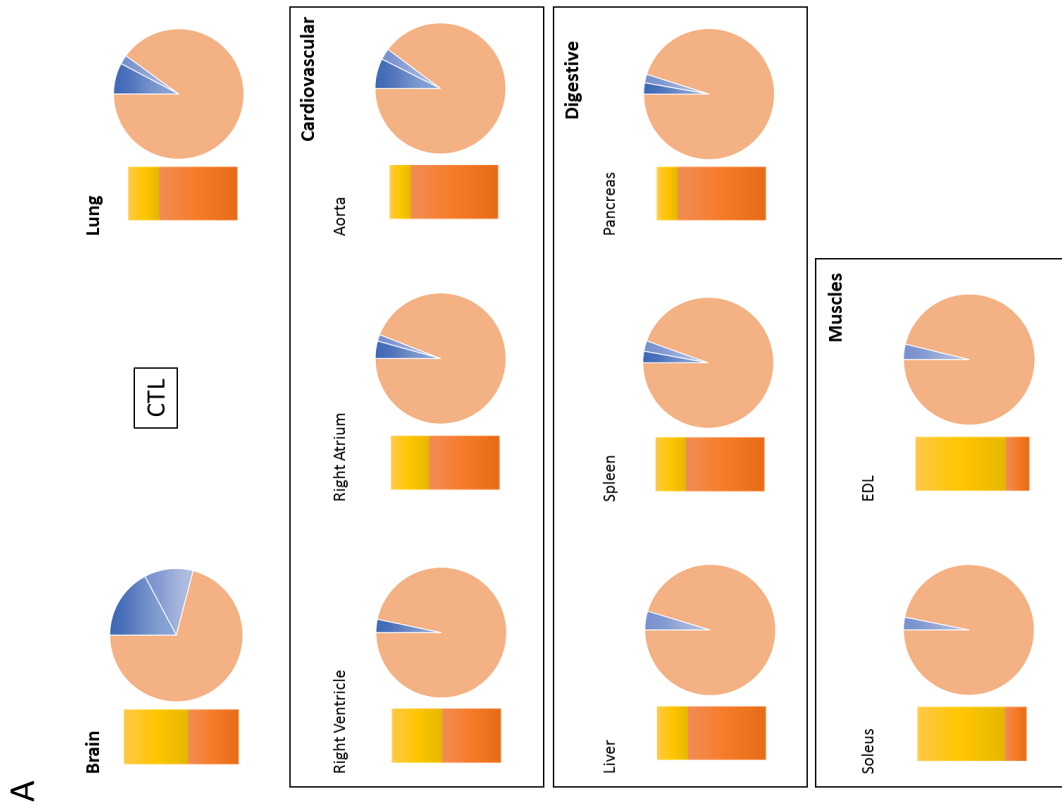

# Supplementary Fig. 12

## Positive ionization (MS)

## PL

Soleus (CTL)

Soleus (HFHF)

Liver (CTL)

Liver (HFHF)

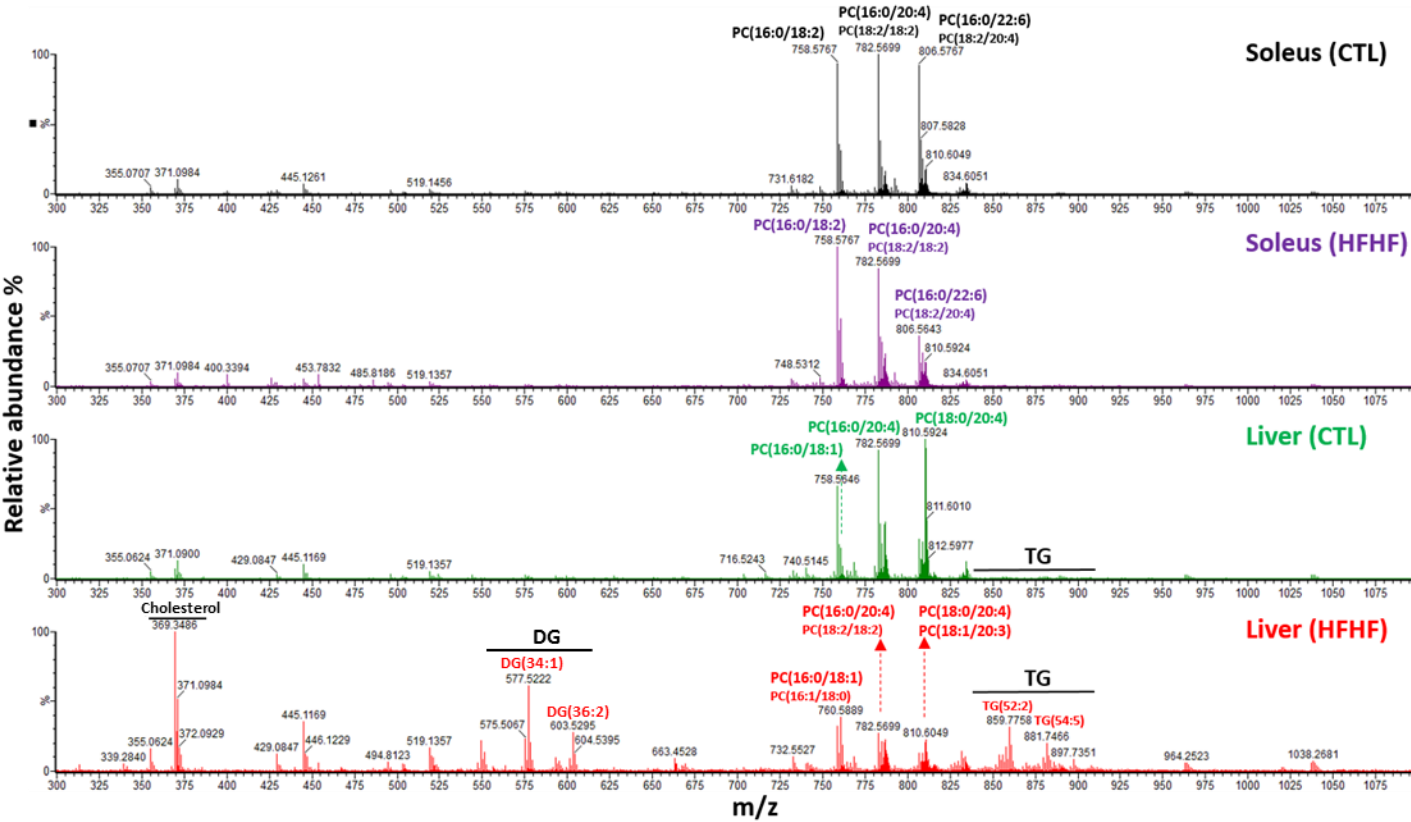

# Supplementary Fig. 13

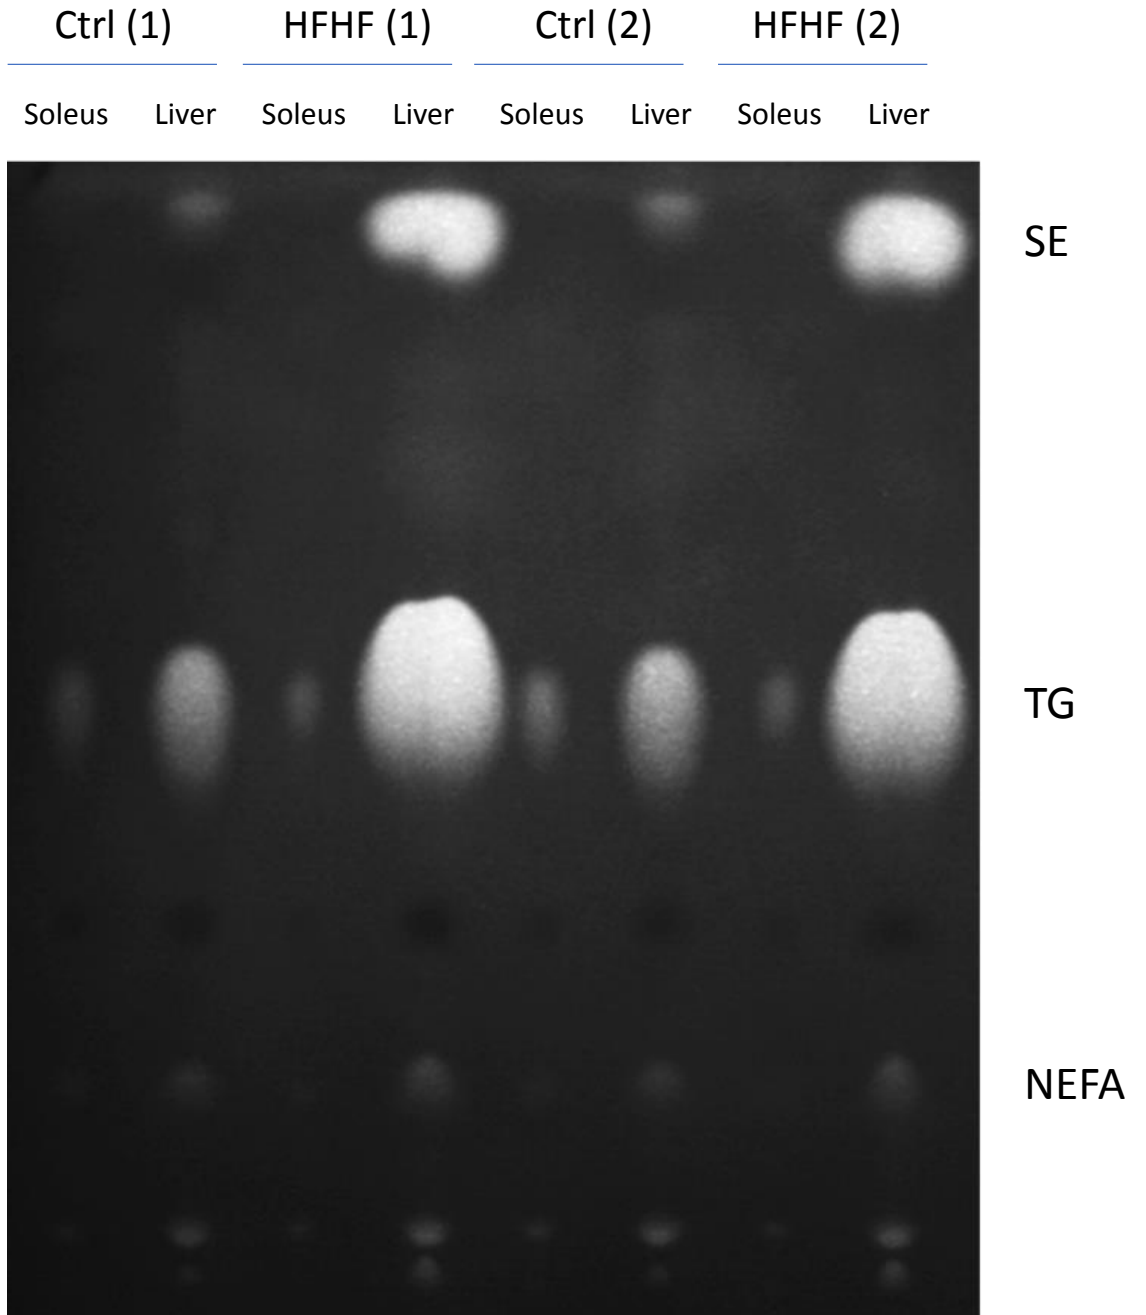

# Supplementary Fig. 14

A

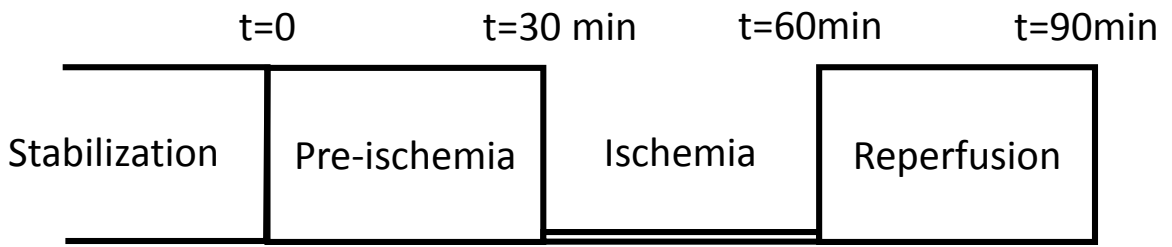

B

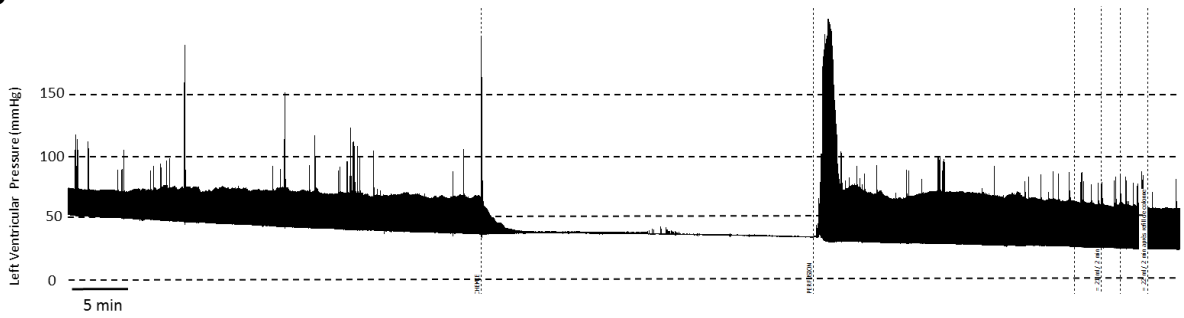

# Supplementary Fig. 15

## ISCHEMIA

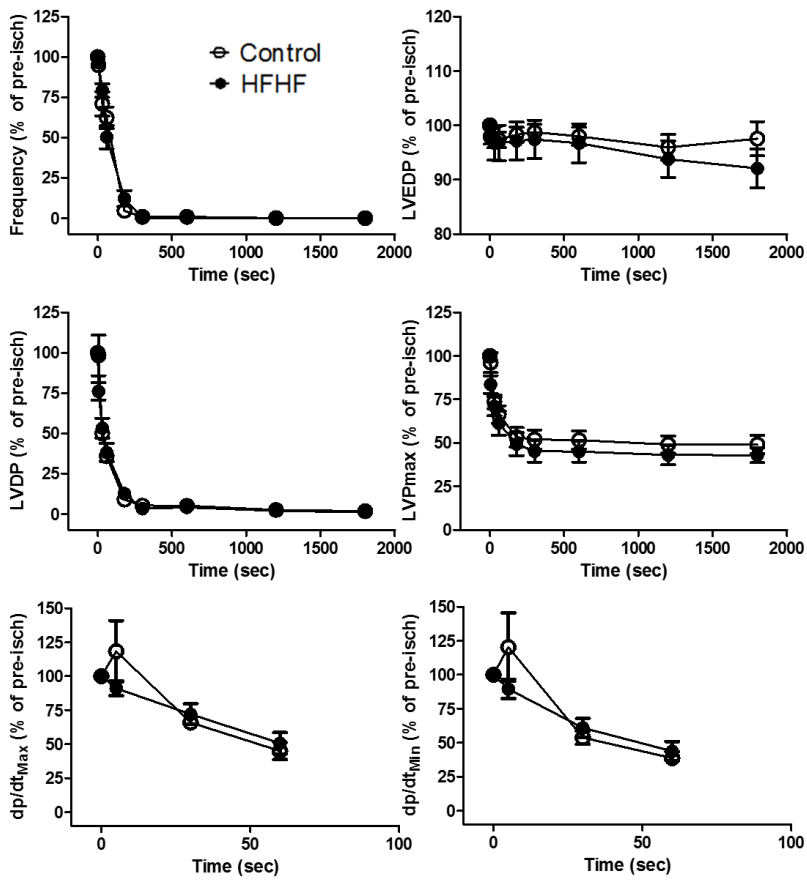

## REPERFUSION

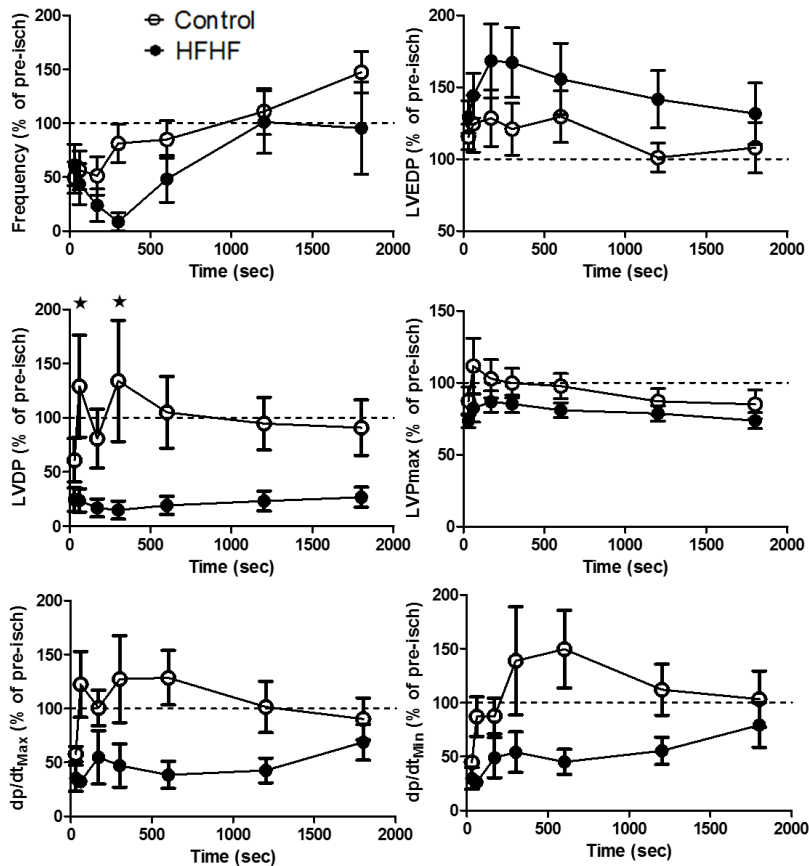

Supplement: Supplementary file [file media-2.pdf]
